# Supplementary material for: Novel thiazoline–coumarin hybrid compounds containing sugar moieties: synthesis, biological evaluation and molecular docking study as antiproliferative agents
Source: Royal Society of Chemistry journal article supplement (doi:10.1039/d1nj00680k), 2021-01-01

## Supplementary Materials for

# Novel thiazoline-coumarin hybrid compounds containing sugar moieties: Synthesis, biological evaluation and molecular docking study as antiproliferative agents

Vu Ngoc Toan <sup>a</sup>, Nguyen Dinh Thanh <sup>\*b</sup>

<sup>a</sup> Institute for Chemistry and Materials, Vietnam Academy of Military Science and Technology, 17 Hoang Sam, Cau Giay, Ha Noi, Viet Nam; <sup>b</sup> Faculty of Chemistry, VNU University of Science (Vietnam National University, Ha Noi), 14 Le Thanh Tong, Hoan Kiem, Ha Noi, Viet Nam.

## Table of Contents

|                                                                                                                                    |            |
|------------------------------------------------------------------------------------------------------------------------------------|------------|
| <b>1. Results of molecular docking study</b>                                                                                       | <b>S3</b>  |
| 1.1. 2D interactions with EGFR (enzyme 5UGB) of selected compounds 4d,4e, and 4f (A–C) and of Sorafenib (D) .....                  | S3         |
| 1.2. 3D interactions with EGFR of selected compounds 4d,4e, and 4f (A–C) and of Sorafenib (D) .....                                | S5         |
| 1.3. Alignments in binding pocket of EGFR (enzyme 5UGB) of selected compounds 4d,4e, and 4f (A–C) and of Sorafenib (D) .....       | S7         |
| 1.4. 2D interactions with HER2 (enzyme 3CRD) of selected compounds 4d,4e, and 4f (A–C) and of Sorafenib (D) .....                  | S9         |
| 1.5. 3D interactions with HER2 of selected compounds 4d,4e, and 4f (A–C) and of Sorafenib (D) .....                                | S11        |
| 1.6. Alignments in binding pocket HER2 (enzyme 3CRD) of selected compounds 4d,4e, and 4f (A–C) and of Sorafenib (D) .....          | S13        |
| <b>2. Selected spectra of substituted 3'-acetylcoumarin N-(2,3,4,6-tetra-O-acetyl-β-D-glycopyranosyl)thiosemicarbazones (3a-g)</b> | <b>S15</b> |
| 3'-Acetylcoumarin N-(2,3,4,6-tetra-O-acetyl-β-D-glucoopyranosyl)thiosemicarbazone ( <b>3a</b> ) .....                              | S15        |
| 3'-Acetyl-6'-chlorocoumarin N-(2,3,4,6-tetra-O-acetyl-β-D-glucoopyranosyl)thiosemicarbazone ( <b>3b</b> ) .....                    | S16        |
| 3'-Acetyl-6'-bromocoumarin N-(2,3,4,6-tetra-O-acetyl-β-D-glucoopyranosyl)thiosemicarbazone ( <b>3c</b> ) .....                     | S18        |
| 6-Pentoxy-4-formylcoumarin N-(2',3',4',6'-tetra-O-acetyl-β-D-glucoopyranosyl)thiosemicarbazone ( <b>3d</b> ) .....                 | S19        |

|                                                                                                                                          |                                                                            |             |
|------------------------------------------------------------------------------------------------------------------------------------------|----------------------------------------------------------------------------|-------------|
| 7-Isobutoxy-4-formylcoumarin                                                                                                             | 4-(2',3',4',6'-tetra-O-acetyl- $\beta$ -D-glucopyranosyl)thiosemicarbazone |             |
| <b>(3e)</b> .....                                                                                                                        |                                                                            | S21         |
| 7-Isopentoxy-4-formylcoumarin                                                                                                            | N-(2',3',4',6'-tetra-O-acetyl- $\beta$ -D-glucopyranosyl)thiosemicarbazone |             |
| <b>(3f)</b> .....                                                                                                                        |                                                                            | S22         |
| 7-Methyl-4-formylcoumarin                                                                                                                | N-(2',3',4',6'-tetra-O-acetyl- $\beta$ -D-glucopyranosyl)thiosemicarbazone | <b>(3g)</b> |
| .....                                                                                                                                    |                                                                            | S24         |
| 3. Spectra of substituted 2,3-dihydro-2(3 <i>H</i> )-thiazoles (4a-g) .....                                                              |                                                                            | S25         |
| 3-(4'-Phenyl-3'-(2'',3'',4'',6''-tetra-O-acetyl- $\beta$ -D-glucopyranosyl)thiazol-2'(3'H)-ylidene)hydrazono)ethyl)coumarin              | <b>(4a)</b> .....                                                          | S25         |
| 3-(4'-Phenyl-3'-(2'',3'',4'',6''-tetra-O-acetyl- $\beta$ -D-galactopyranosyl)thiazol-2'(3'H)-ylidene)hydrazono)ethyl)-6-chlorocoumarin   | <b>(4b)</b> .....                                                          | S27         |
| 3-(4'-Phenyl-3'-(2'',3'',4'',6''-tetra-O-acetyl- $\beta$ -D-galactopyranosyl)thiazol-2'(3'H)-ylidene)hydrazono)ethyl)-6-bromocoumarin    | <b>(4c)</b> .....                                                          | S28         |
| 4-(4'-Phenyl-3'-(2'',3'',4'',6''-tetra-O-acetyl- $\beta$ -D-glucopyranosyl)thiazol-2'(3'H)-ylidene)hydrazono)methyl)-6-pentoxycoumarin   | <b>(4d)</b> .....                                                          | S30         |
| 4-(4'-Phenyl-3'-(2'',3'',4'',6''-tetra-O-acetyl- $\beta$ -D-glucopyranosyl)thiazol-2'(3'H)-ylidene)hydrazono)methyl)-7-isobutoxycoumarin | <b>(4e)</b> .....                                                          | S31         |
| 4-(4'-Phenyl-3-(2,3,4,6-tetra-O-acetyl- $\beta$ -D-glucopyranosyl)thiazol-2'(3'H)-ylidene)hydrazono)methyl)-7-isopentoxycoumarin         | <b>(4f)</b> .....                                                          | S33         |
| 4-(4'-Phenyl-3'-(2'',3'',4'',6''-tetra-O-acetyl- $\beta$ -D-glucopyranosyl)thiazol-2'(3'H)-ylidene)hydrazono)methyl)-7-methylcoumarin    | <b>(4g)</b> .....                                                          | S34         |

## 1. Results of molecular docking study

### 1.1. 2D interactions with EGFR (enzyme 5UGB) of selected compounds 4d,4e, and 4f (A–C) and of Sorafenib (D)

(A) Compound **4d** (R = 6-OC<sub>5</sub>H<sub>11</sub>)

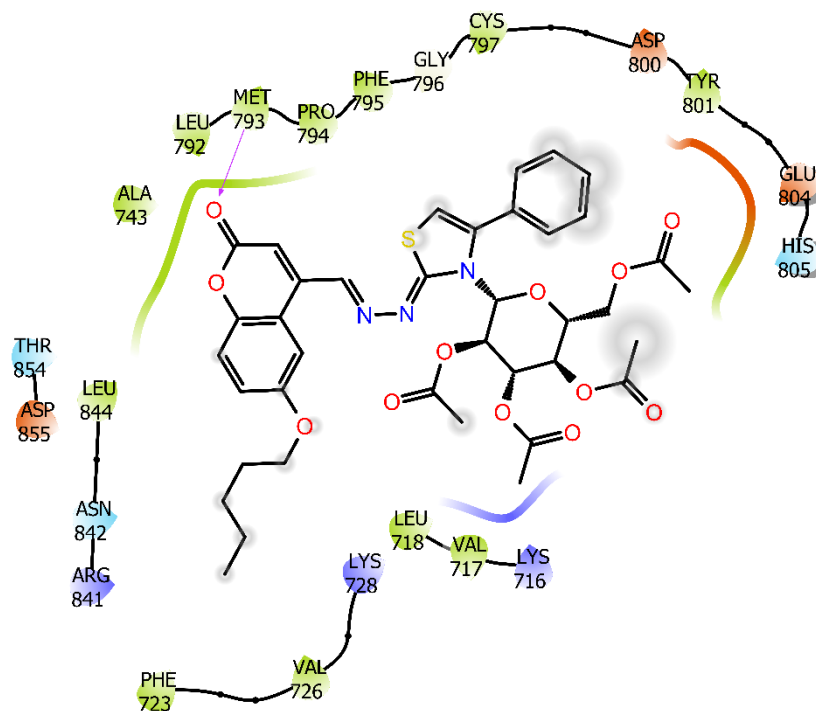

(B) Compound **4e** (R = 7-O<sup>i</sup>C<sub>4</sub>H<sub>9</sub>)

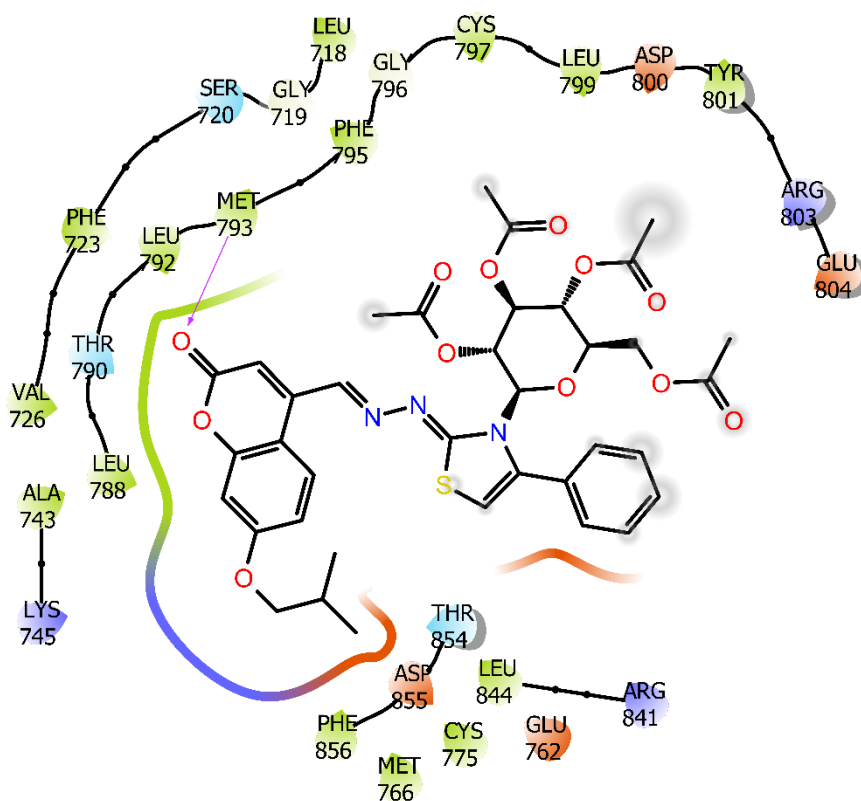

(C) Compound **4f** (R = 7-O<sup>t</sup>C<sub>5</sub>H<sub>11</sub>)

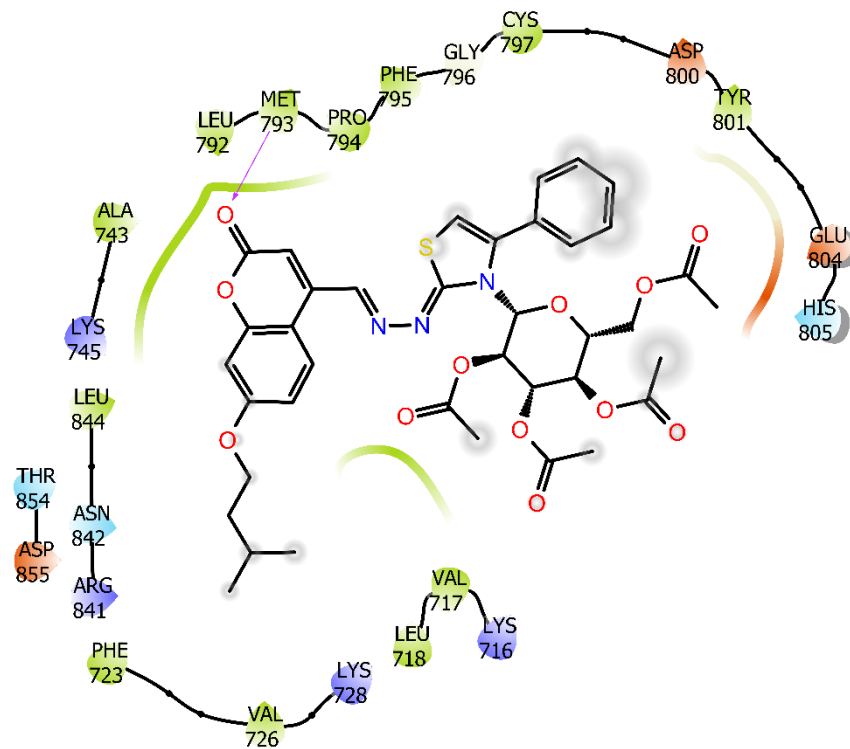

(D) Sorafenib

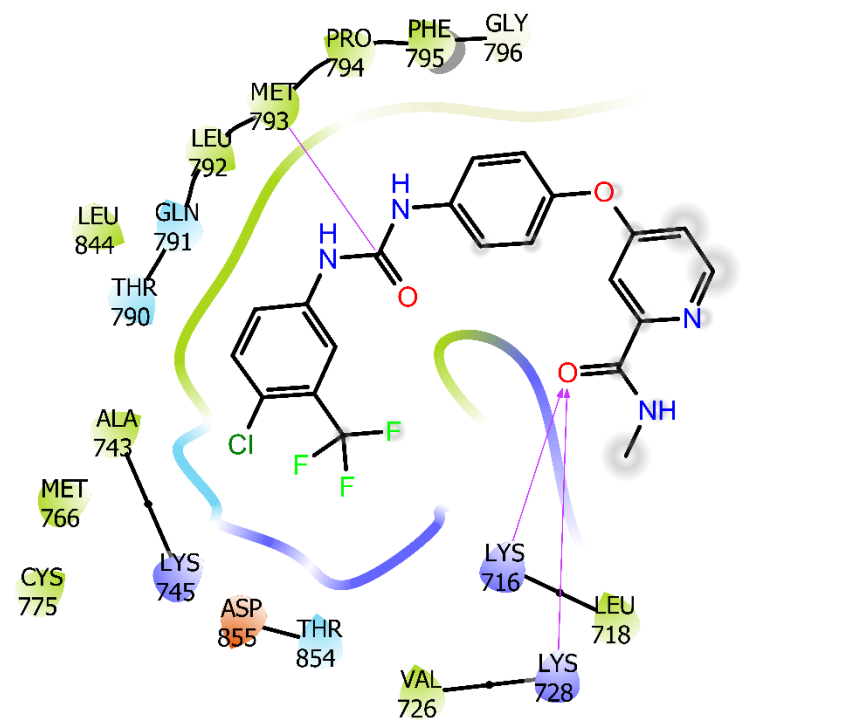

## 1.2. 3D interactions with EGFR of selected compounds 4d,4e, and 4f (A–C) and of Sorafenib (D)

(A) Compound **4d** (R = 6-OC<sub>5</sub>H<sub>11</sub>)

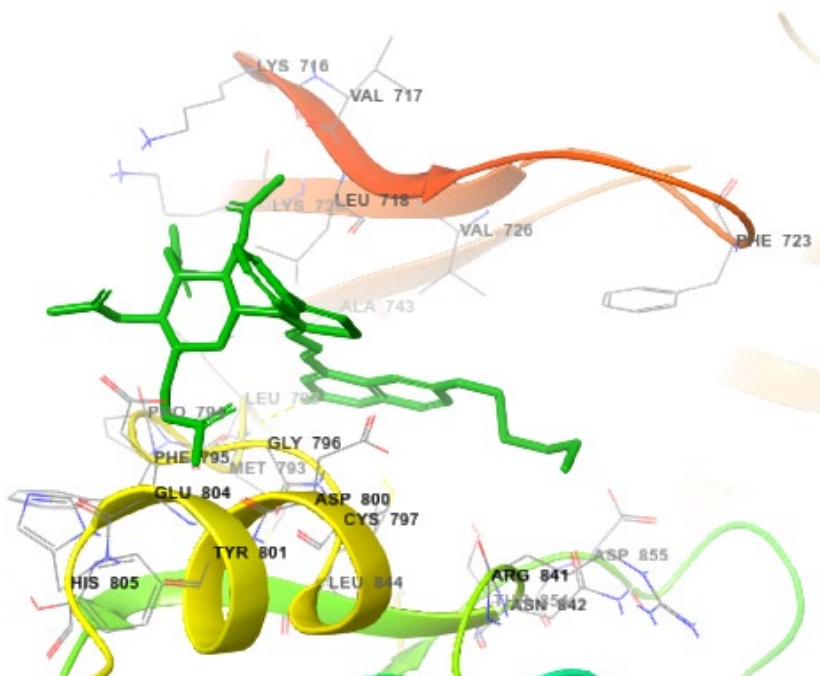

(B) Compound **4e** (R = 7-O<sup>i</sup>C<sub>4</sub>H<sub>9</sub>)

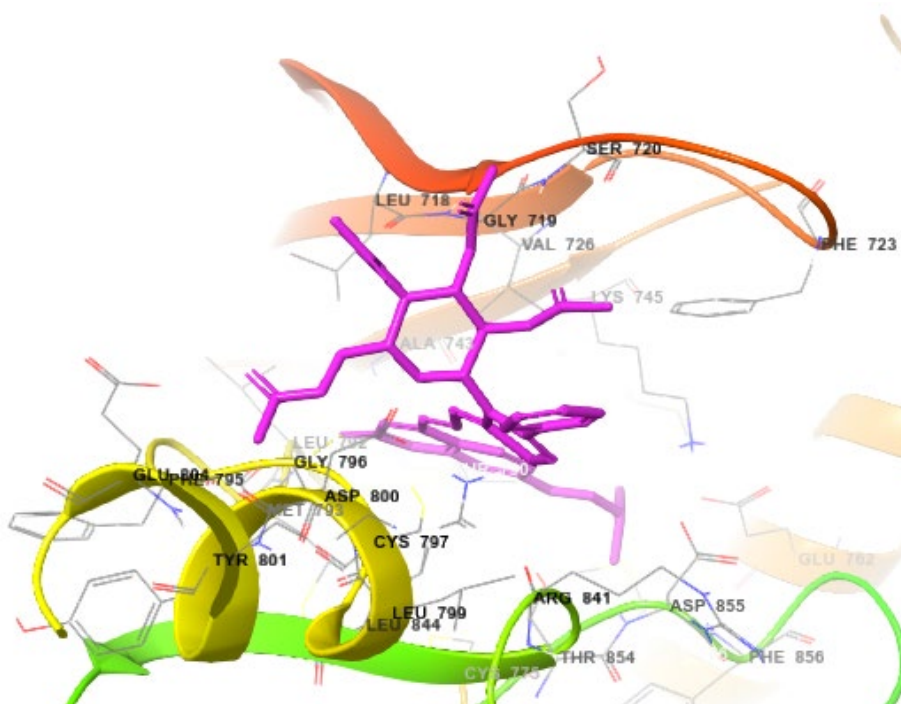

(C) Compound **4f** (R = 7-O<sup>t</sup>C<sub>5</sub>H<sub>11</sub>)

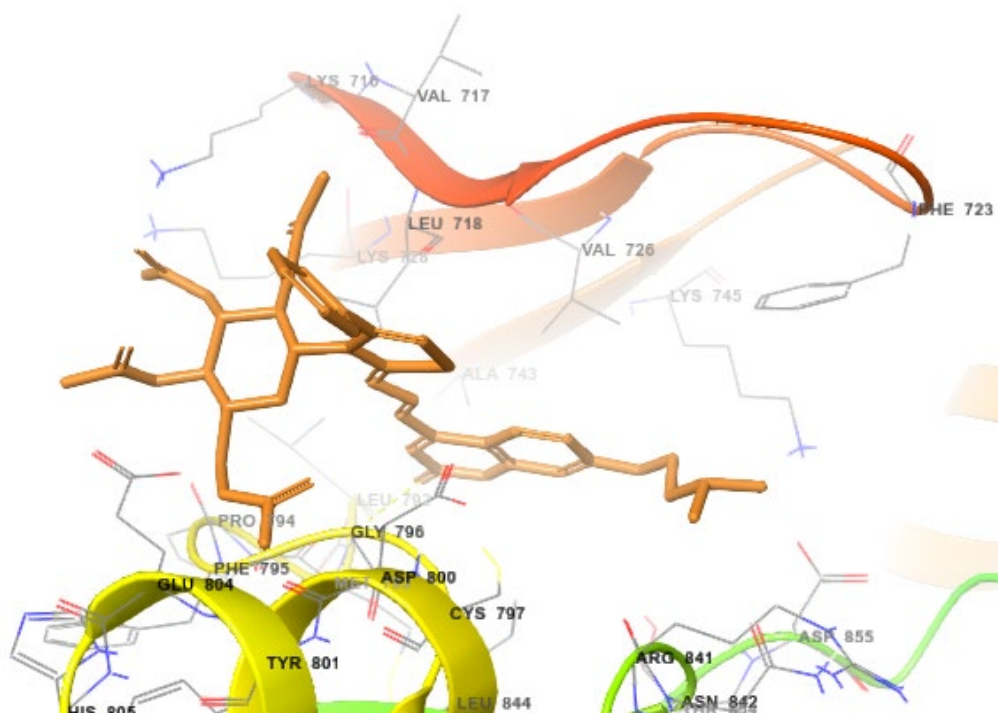

(D) Sorafenib

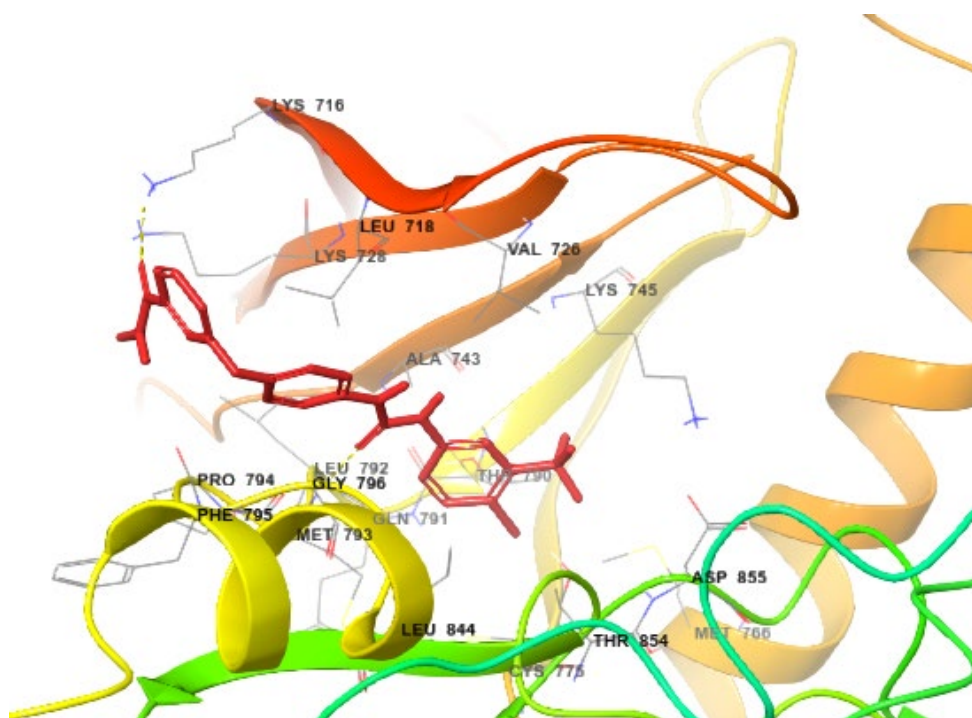

### 1.3. Alignments in binding pocket of EGFR (enzyme 5UGB) of selected compounds 4d,4e, and 4f (A–C) and of Sorafenib (D)

(A) Compound **4d** (R = 6-OC<sub>5</sub>H<sub>11</sub>)

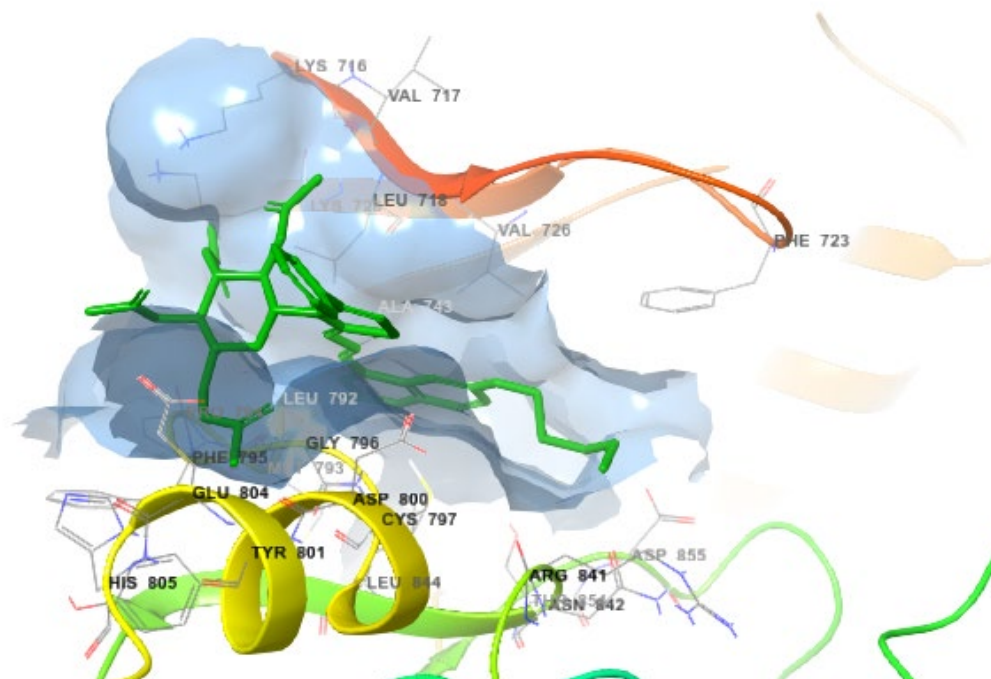

(B) Compound **4e** (R = 7-O<sup>i</sup>C<sub>4</sub>H<sub>9</sub>)

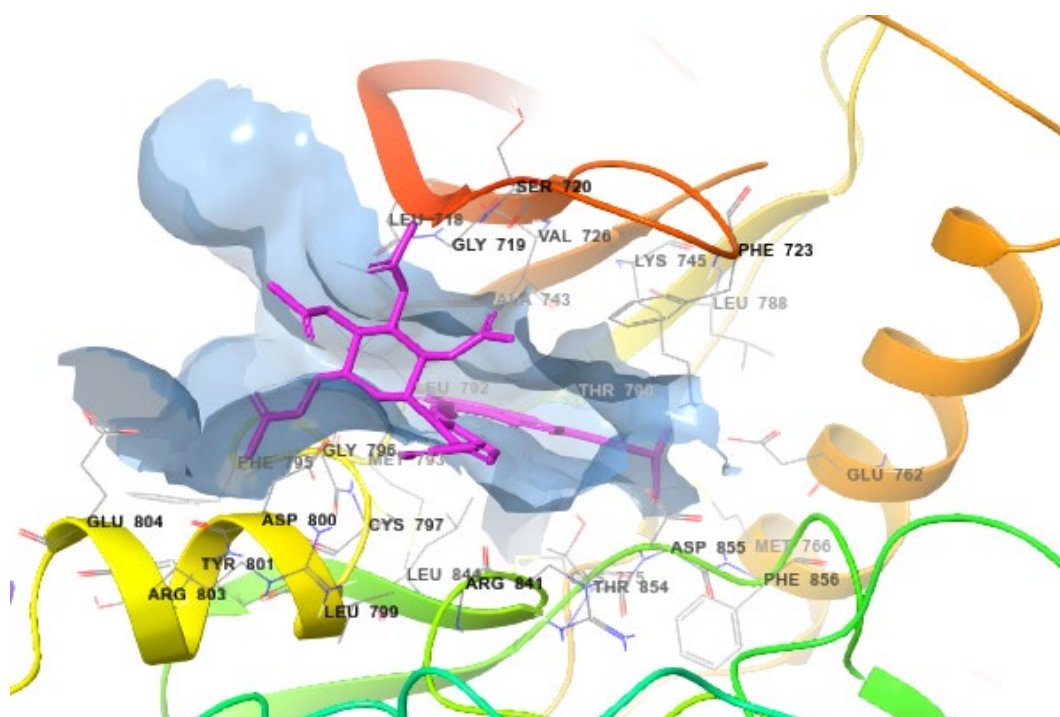

(C) Compound **4f** (R = 7-O<sup>i</sup>C<sub>5</sub>H<sub>11</sub>)

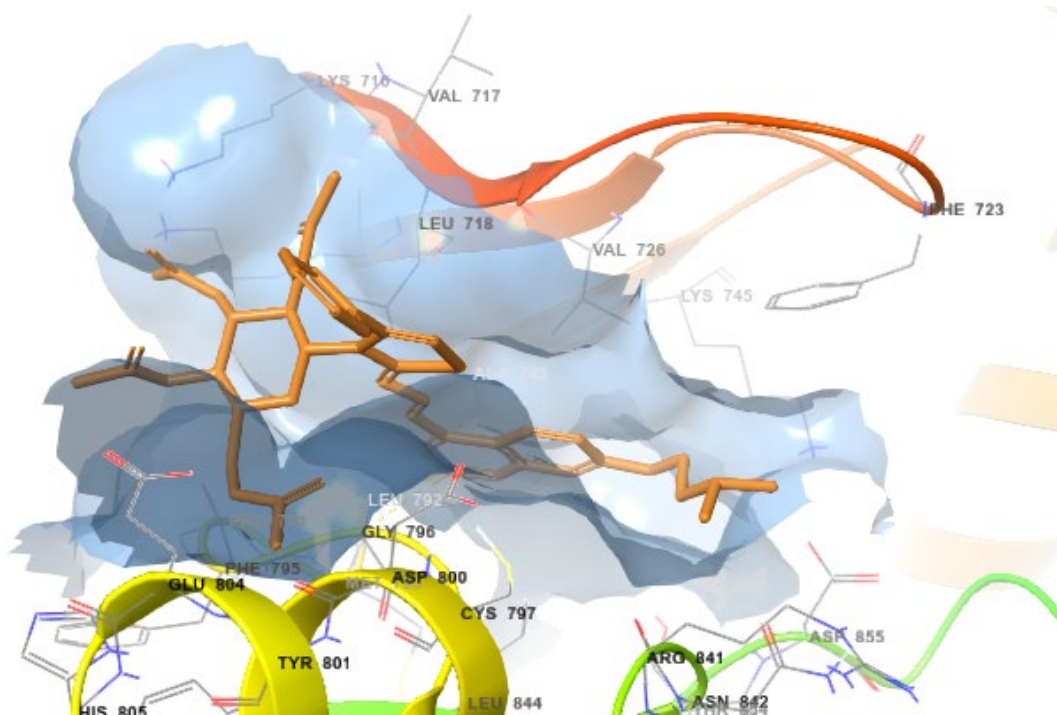

(D) Sorafenib

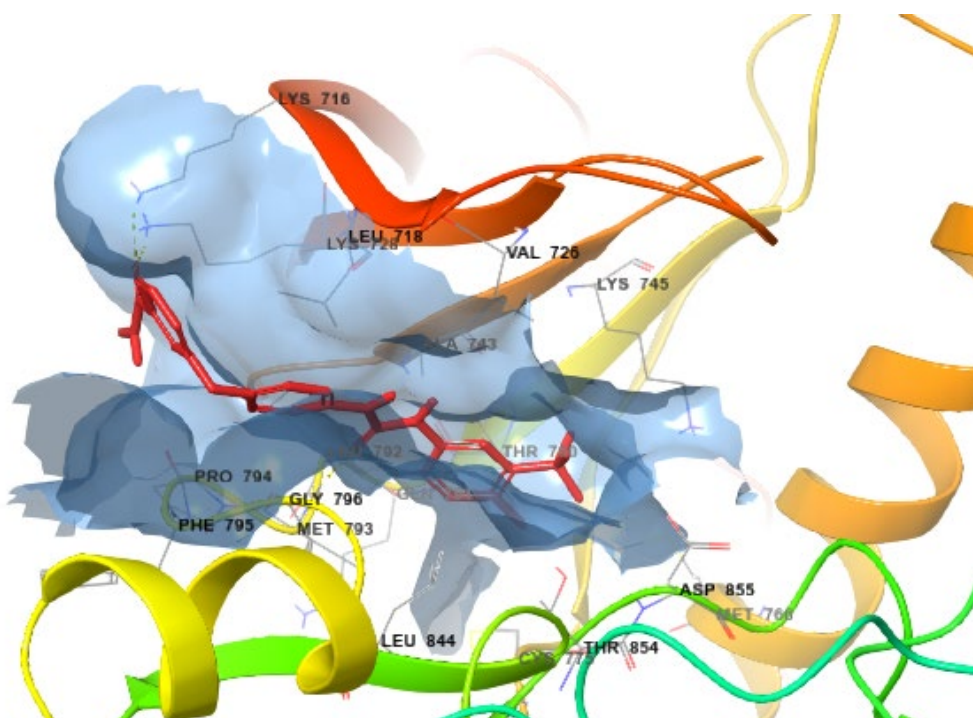



### 1.4. 2D interactions with HER2 (enzyme 3CRD) of selected compounds 4d,4e, and 4f (A–C) and of Sorafenib (D)

(A) Compound **4d** (R = 6-OC<sub>5</sub>H<sub>11</sub>)

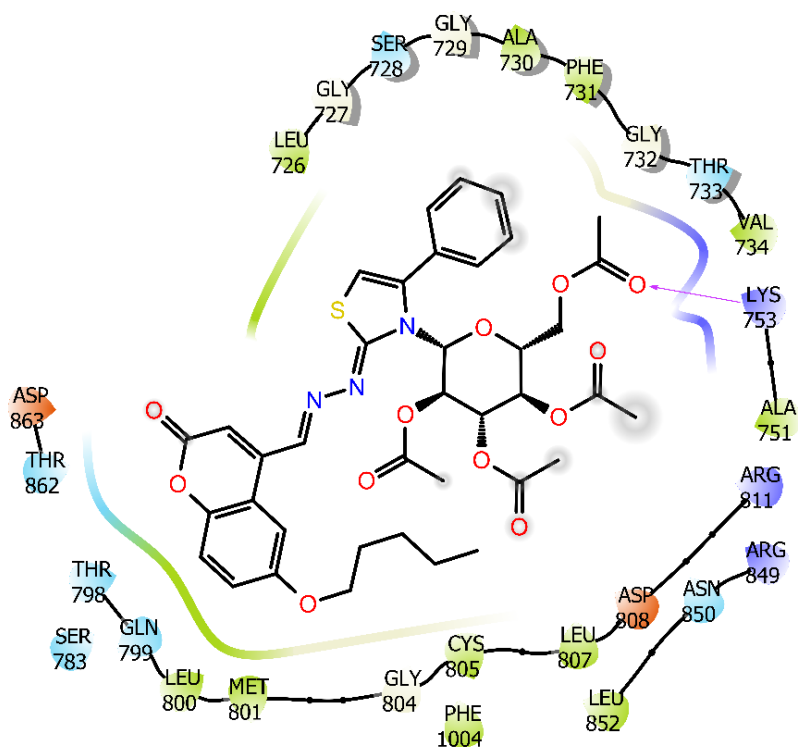

(B) Compound **4e** (R = 7-O'C<sub>4</sub>H<sub>9</sub>)

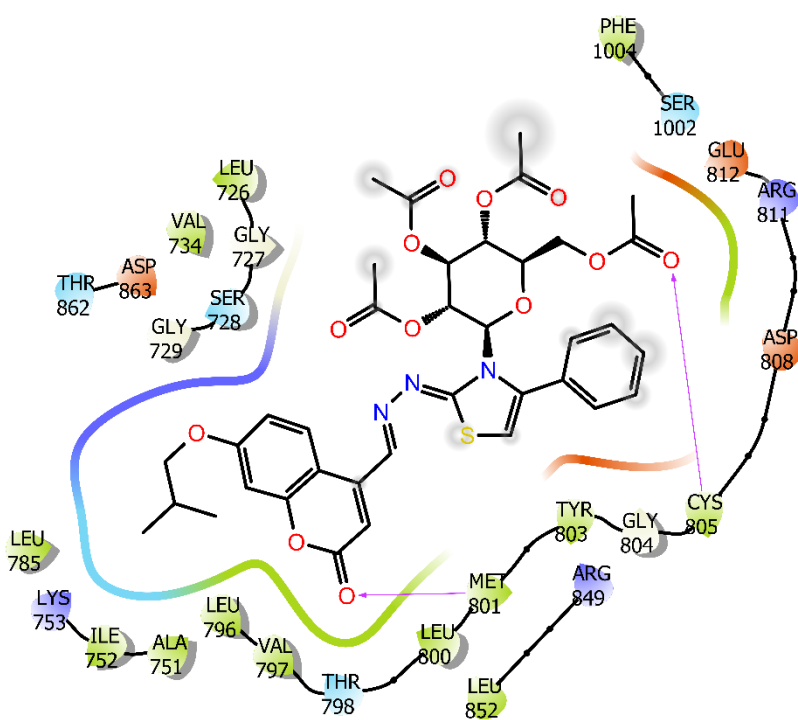

(C) Compound **4f** (R = 7-O<sup>t</sup>C<sub>5</sub>H<sub>11</sub>)

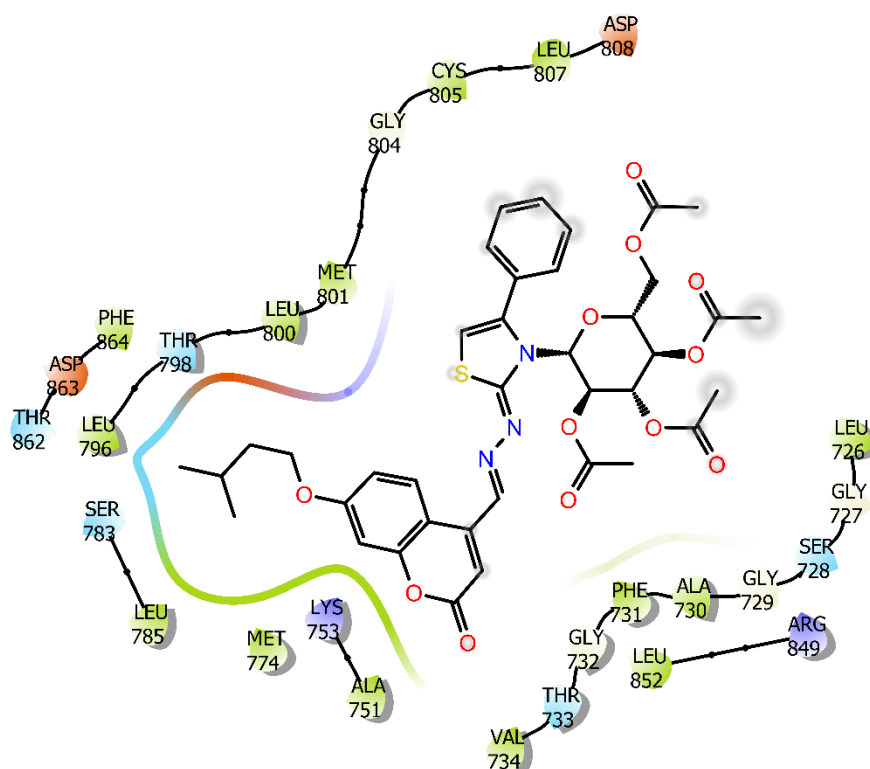

(D) Sorafenib

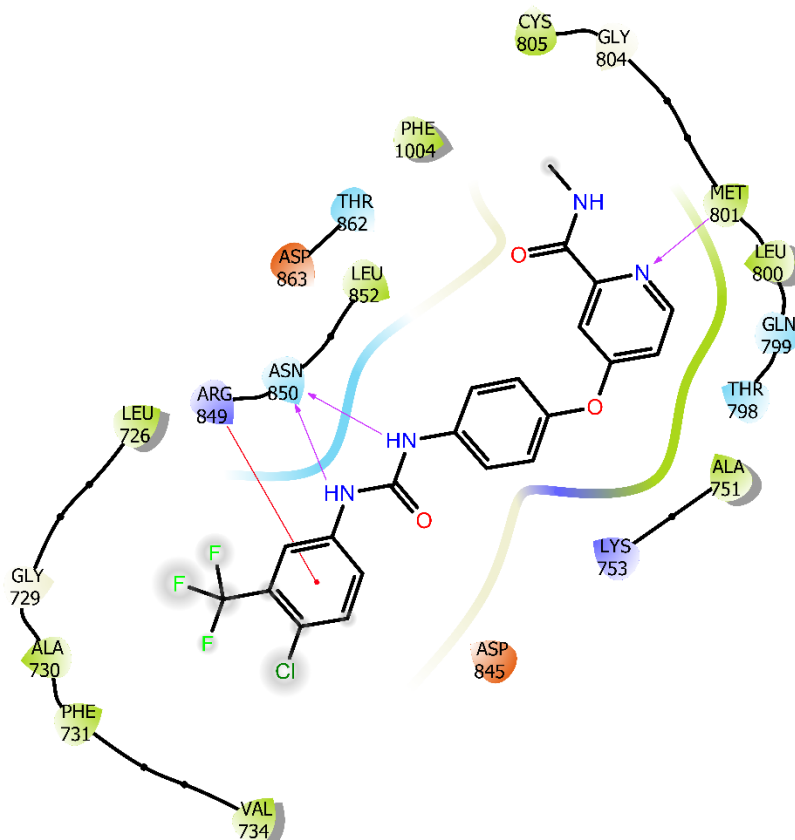

### 1.5. 3D interactions with HER2 of selected compounds 4d,4e, and 4f (A–C) and of Sorafenib (D)

(A) Compound 4d (R = 6-OC<sub>5</sub>H<sub>11</sub>)

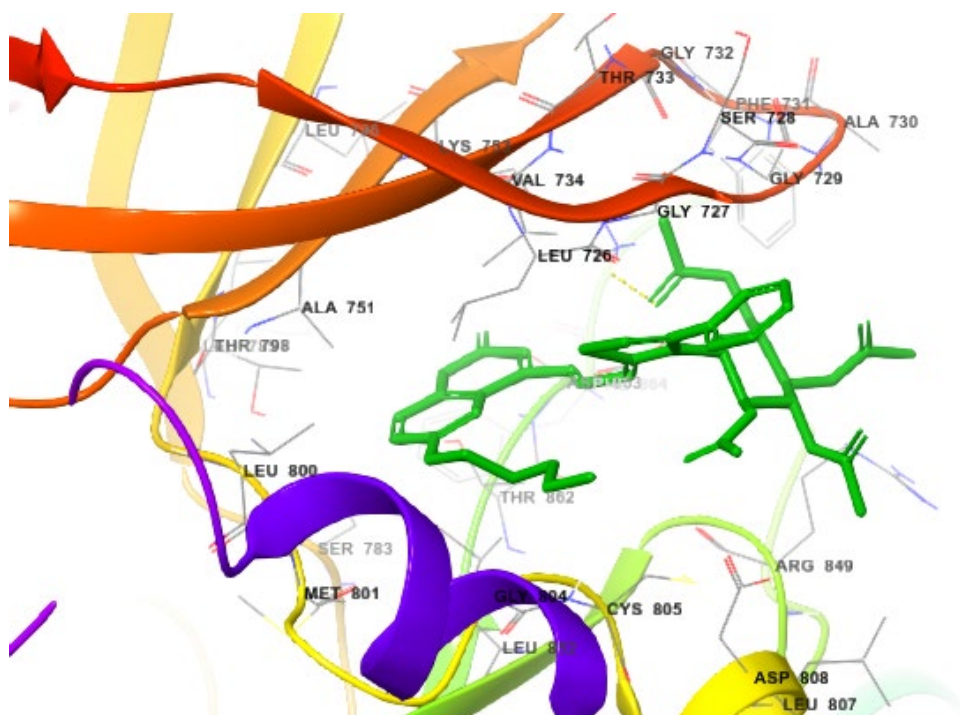

(B) Compound 4e (R = 7-O'C<sub>4</sub>H<sub>9</sub>)

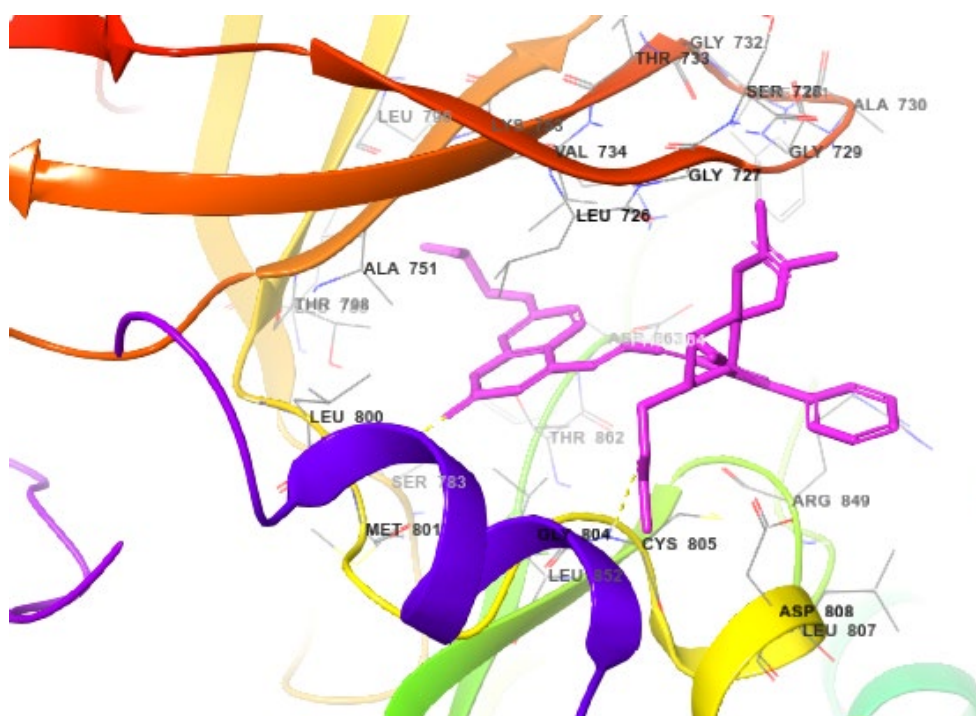

(C) Compound **4f** (R = 7-O<sup>i</sup>C<sub>5</sub>H<sub>11</sub>)

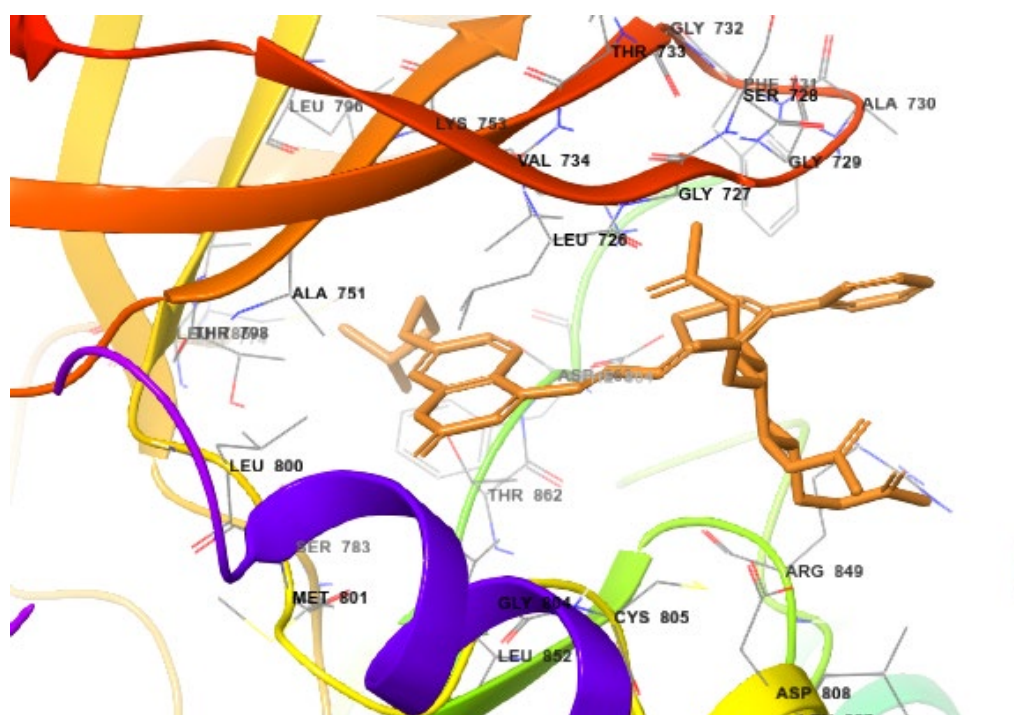

(D) Sorafenib

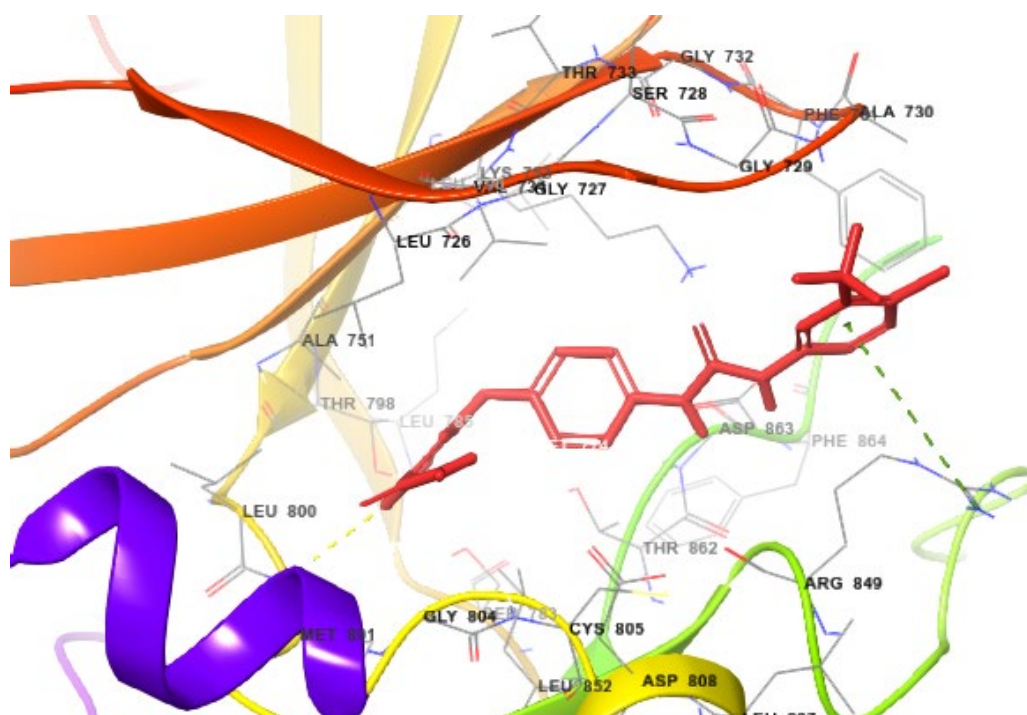

## 1.6. Alignments in binding pocket HER2 (enzyme 3CRD) of selected compounds 4d,4e, and 4f (A–C) and of Sorafenib (D)

(A) Compound **4d** (R = 6-OC<sub>5</sub>H<sub>11</sub>)

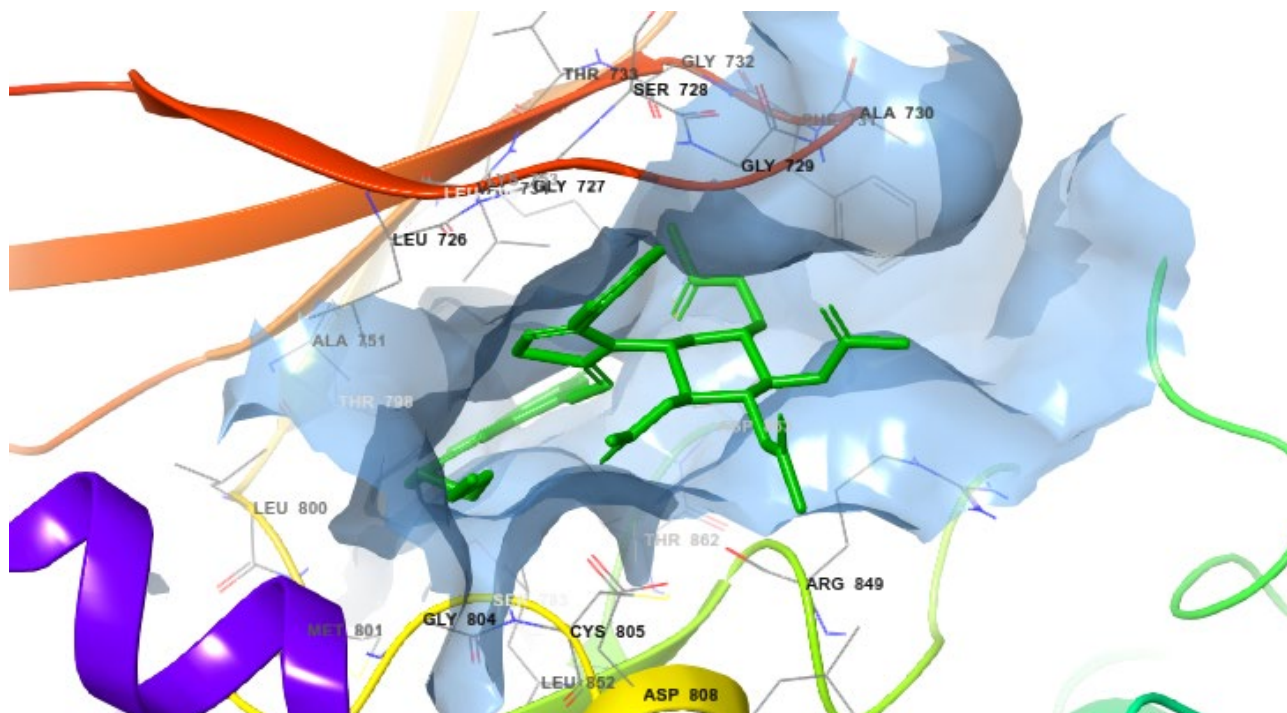

(B) Compound **4e** (R = 7-O'C<sub>4</sub>H<sub>9</sub>)

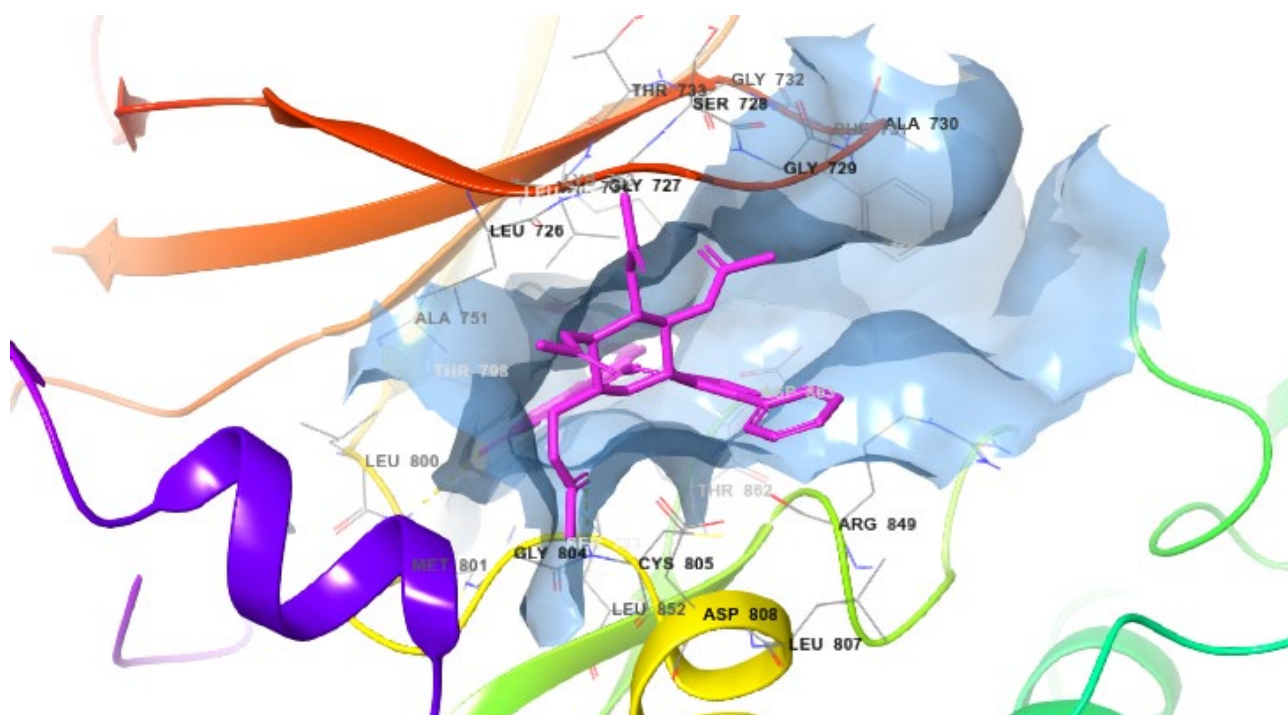

(C) Compound **4f** (R = 7-O'C<sub>5</sub>H<sub>11</sub>)

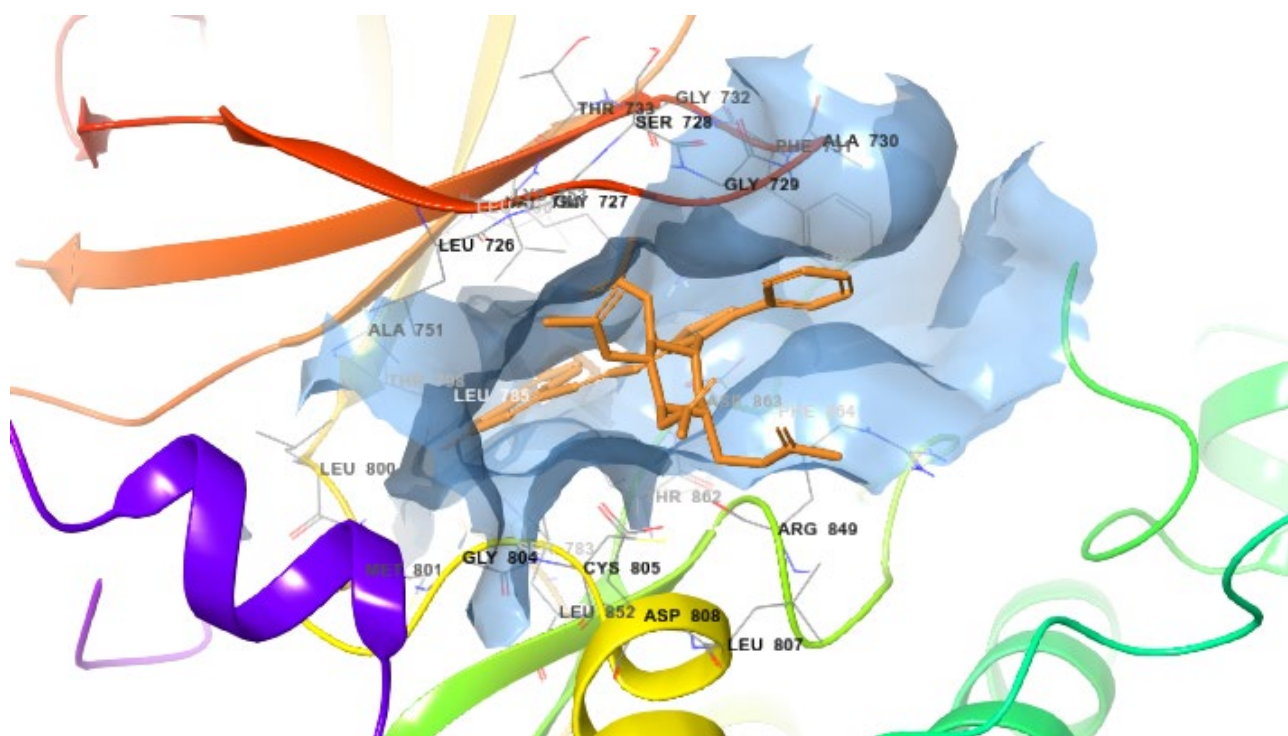

(D) Sorafenib

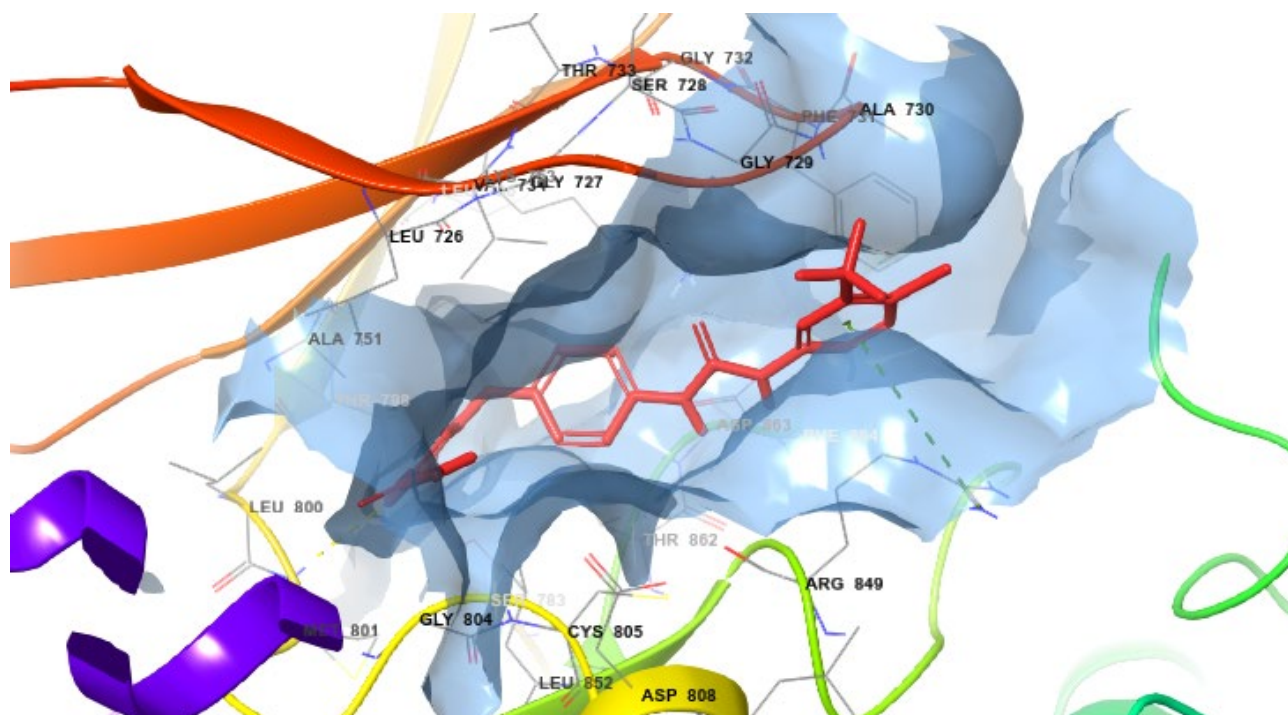

## 2. Selected spectra of substituted 3'-acetylcoumarin *N*-(2,3,4,6-tetra-*O*-acetyl- $\beta$ -D-glycopyranosyl)thiosemicarbazones (3a-g)

### 3'-Acetylcoumarin *N*-(2,3,4,6-tetra-*O*-acetyl- $\beta$ -D-glycopyranosyl)thiosemicarbazone (3a)

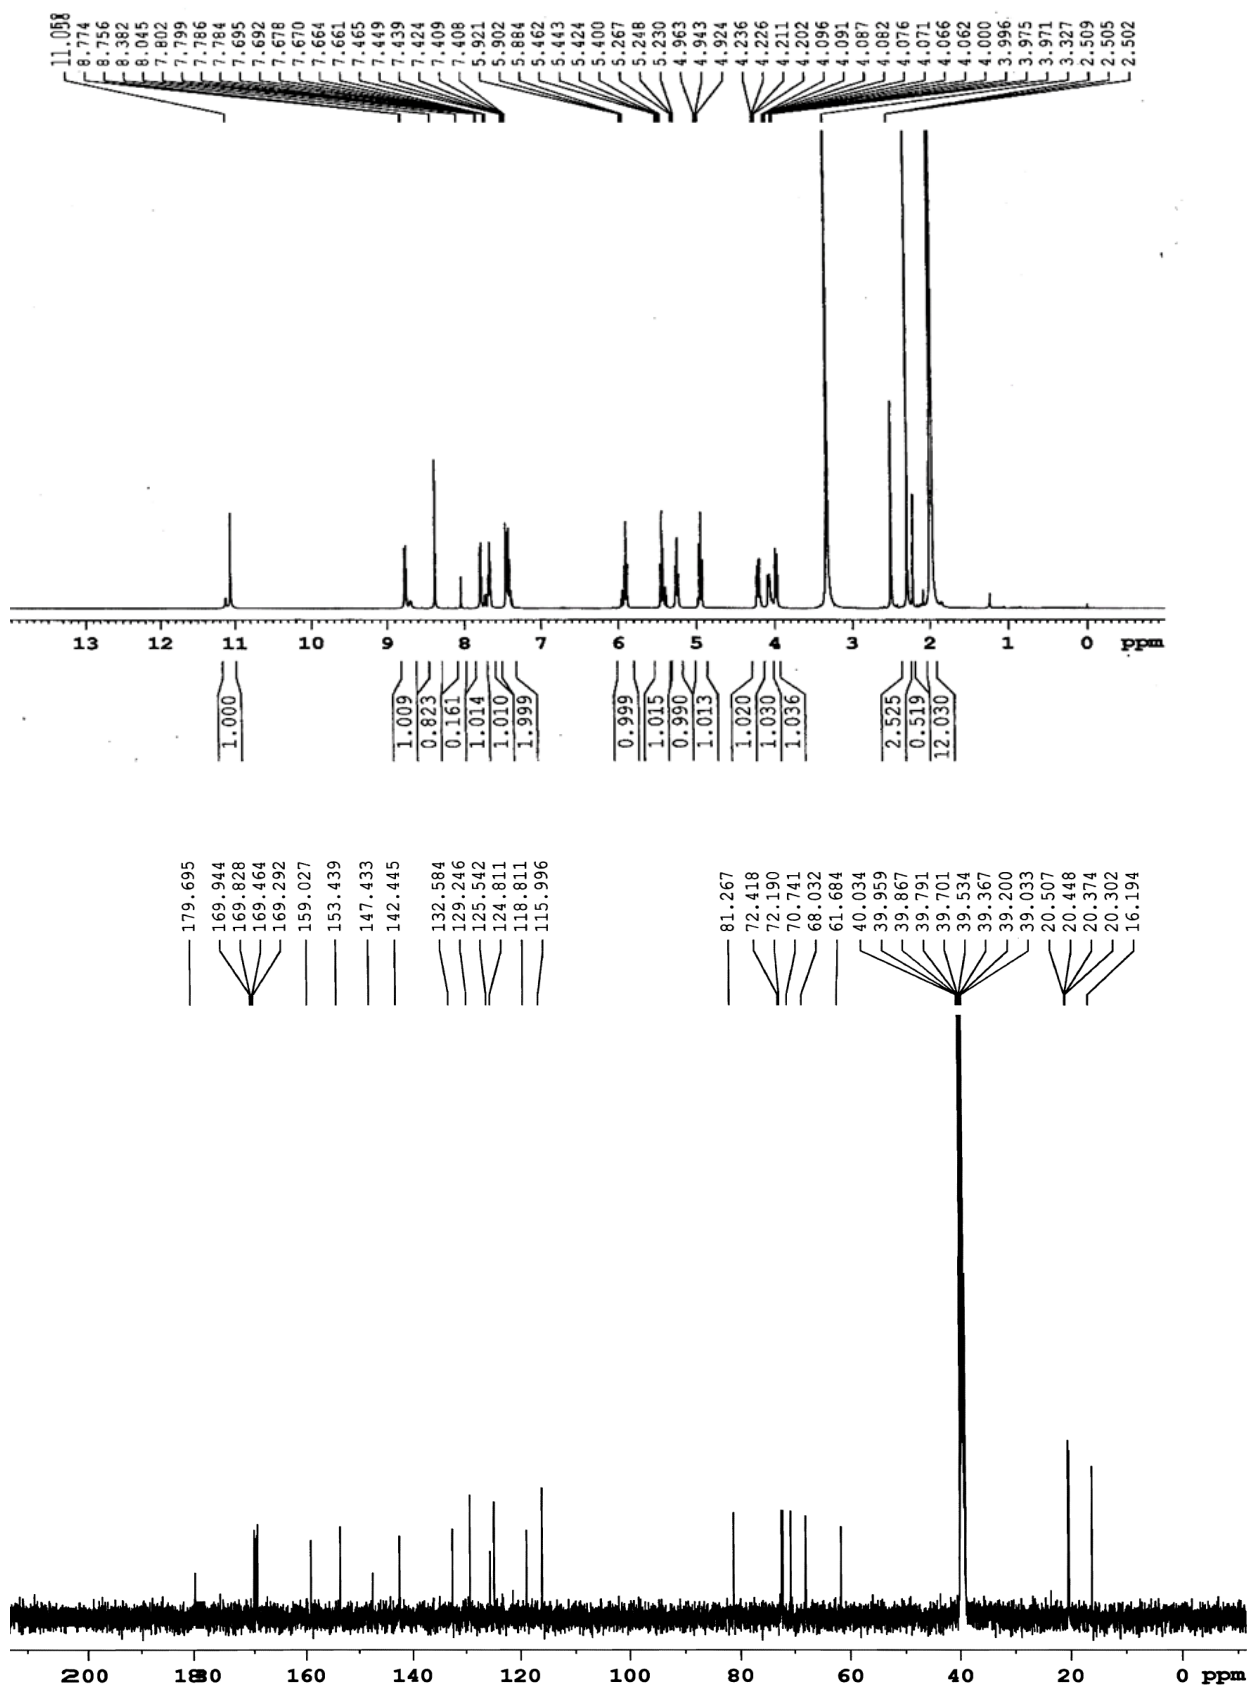

6D\_200506135522 #127 RT: 1.27 AV: 1 NL: 1.73E5  
T: ITMS + c ESI Full ms [50.00-2000.00]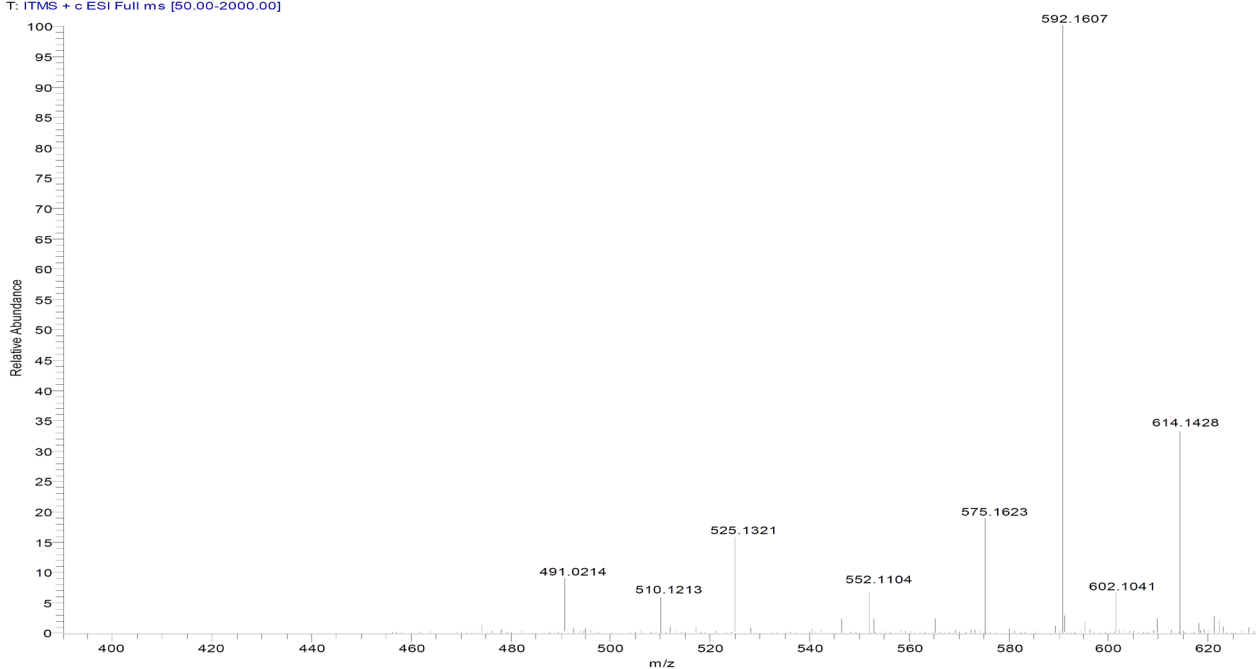

*3'-Acetyl-6'-chlorocoumarin N-(2,3,4,6-tetra-O-acetyl- $\beta$ -D-glucopyranosyl)thiosemicarbazone (3b)*

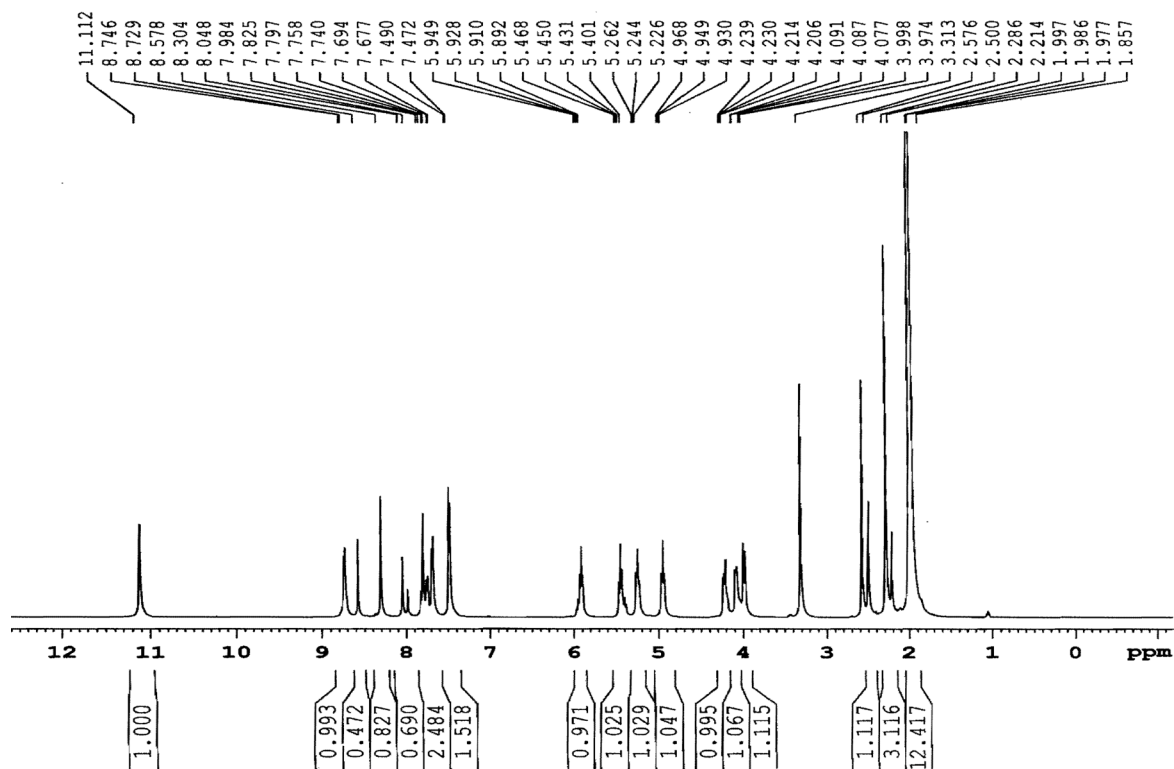



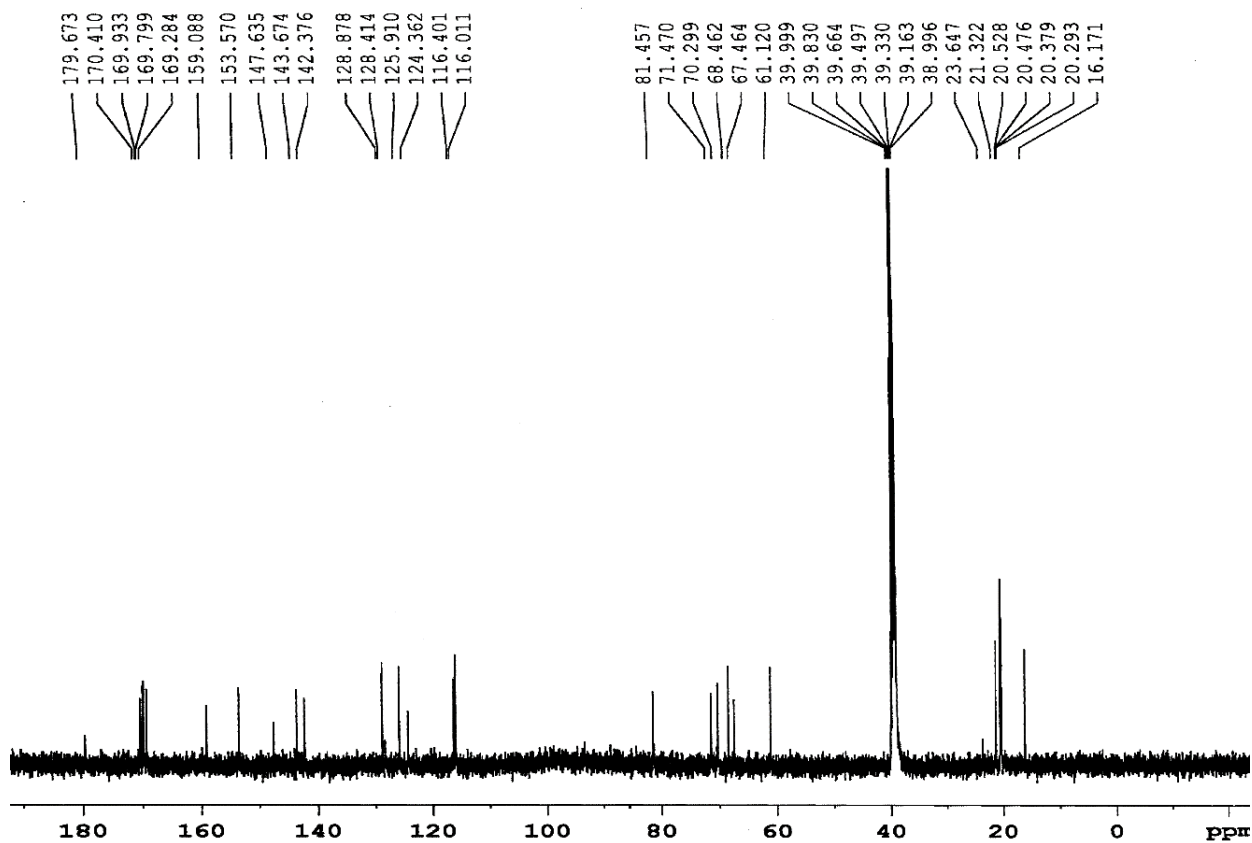

C:\LTQ Orbitrap\...16G\_200506135523

8/9/2020 2:11:34 PM Mode: ESI, M+H

6D\_200506135522 #127 RT: 1.27 AV: 1 NL: 1.73E5  
T: ITMS + c ESI Full ms [50.00-2000.00]

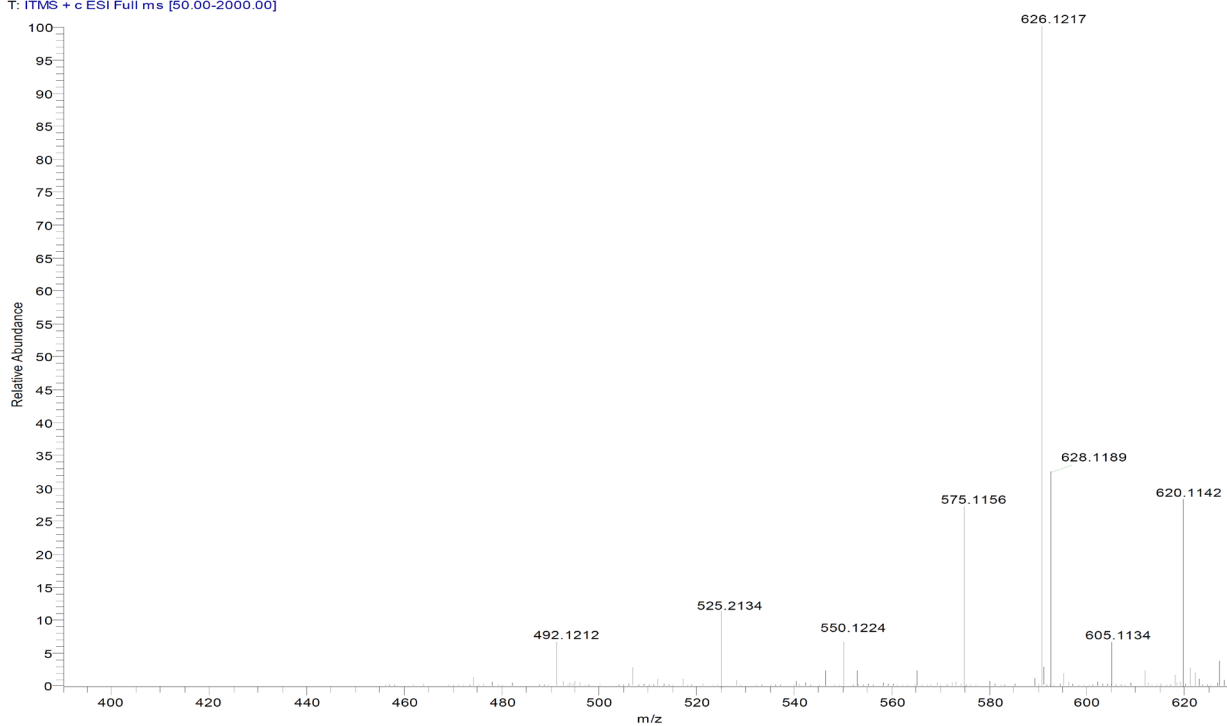

3'-Acetyl-6'-bromocoumarin N-(2,3,4,6-tetra-O-acetyl-β-D-glucopyranosyl)thiosemicarbazone (3c)

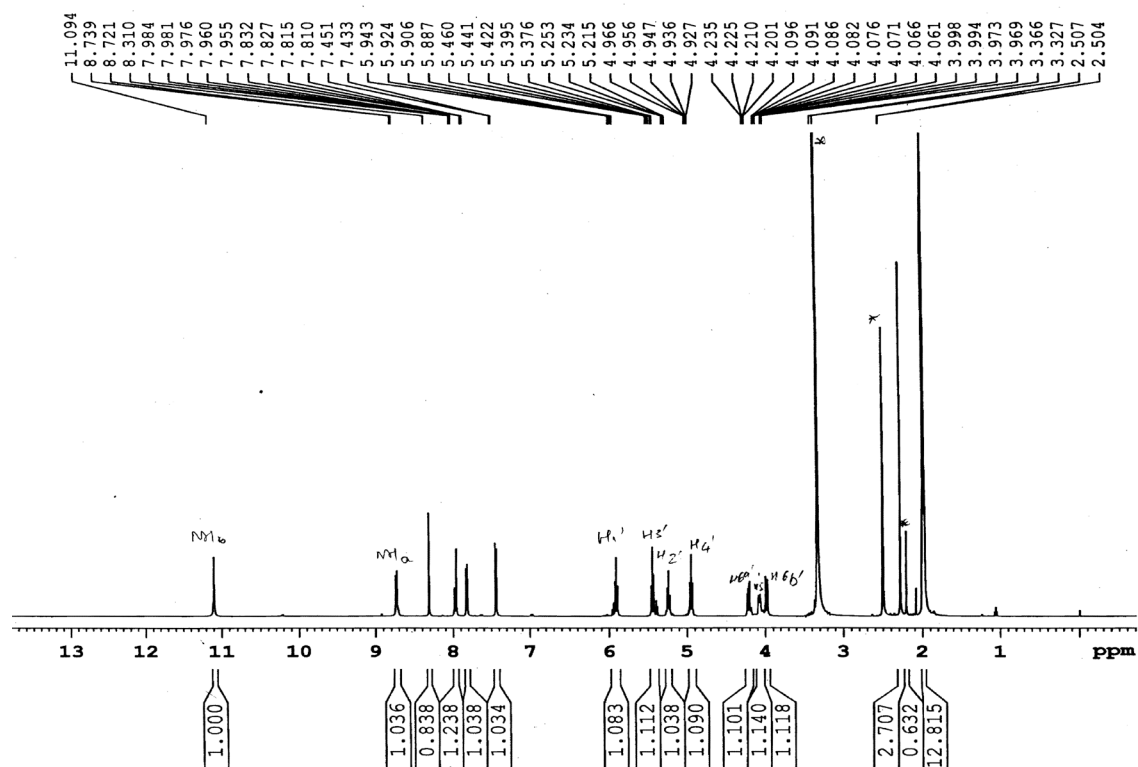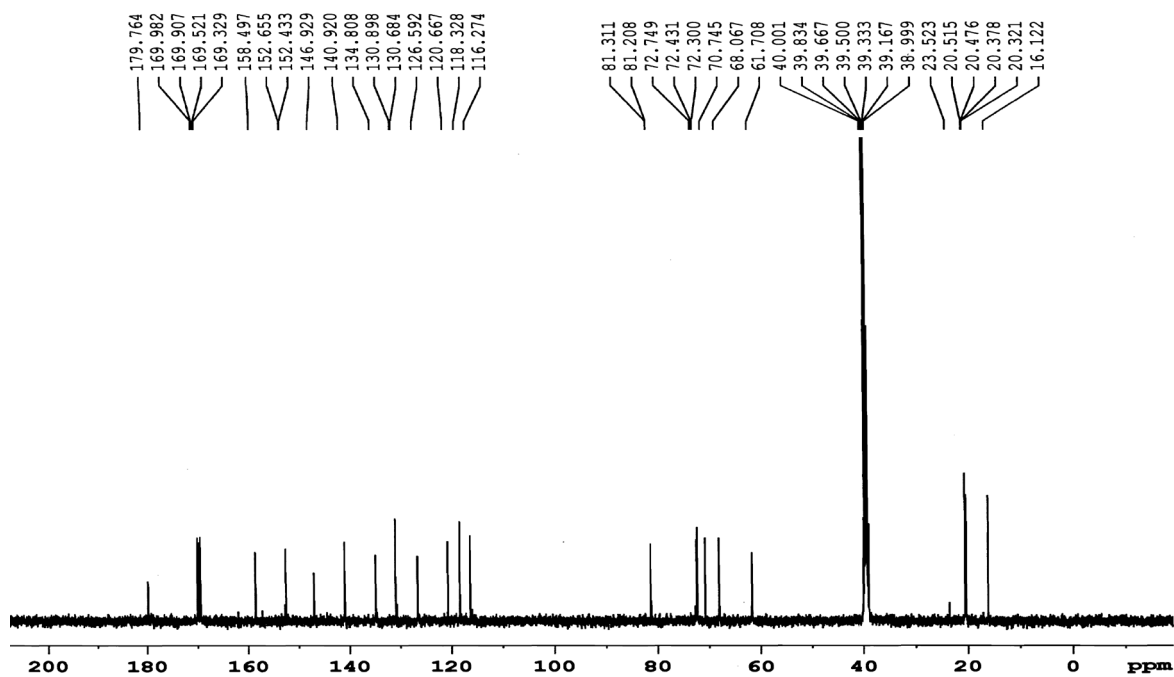

6D\_200506135522 #127 RT: 1.27 AV: 1 NL: 1.73E5  
T: ITMS + c ESI Full ms [50.00-2000.00]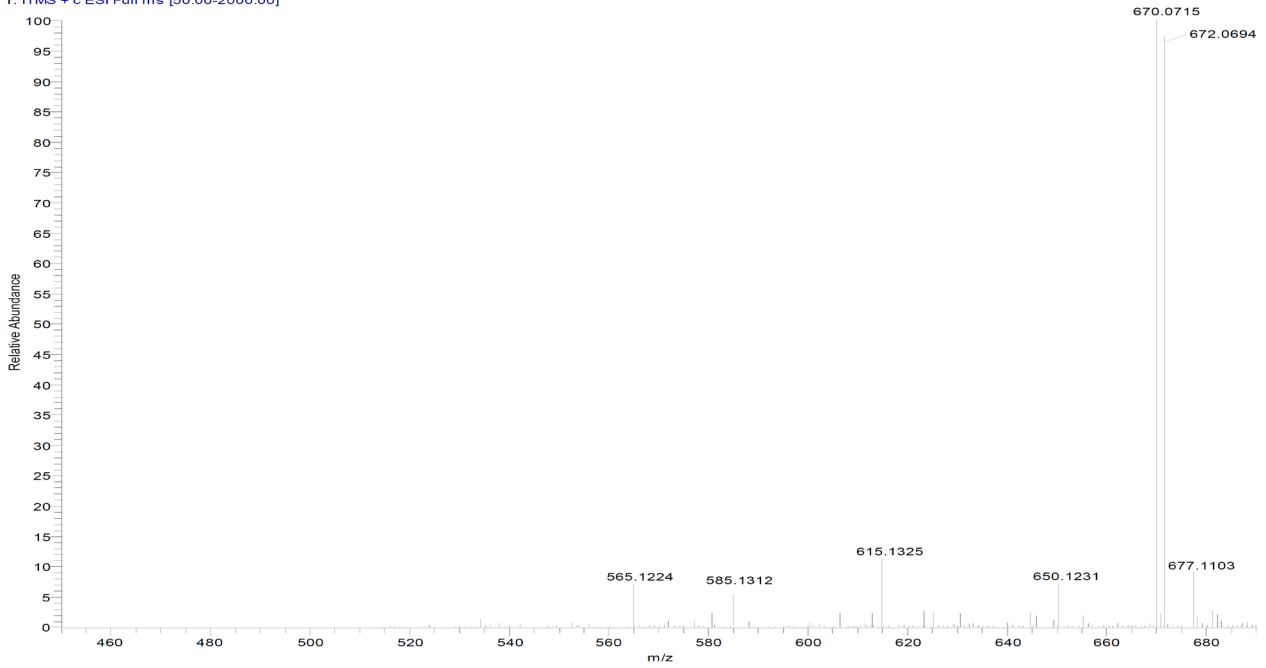

*6-Pentoxo-4-formylcoumarin N-(2',3',4',6'-tetra-O-acetyl- $\beta$ -D-glucopyranosyl)thiosemicarbazone (3d)*

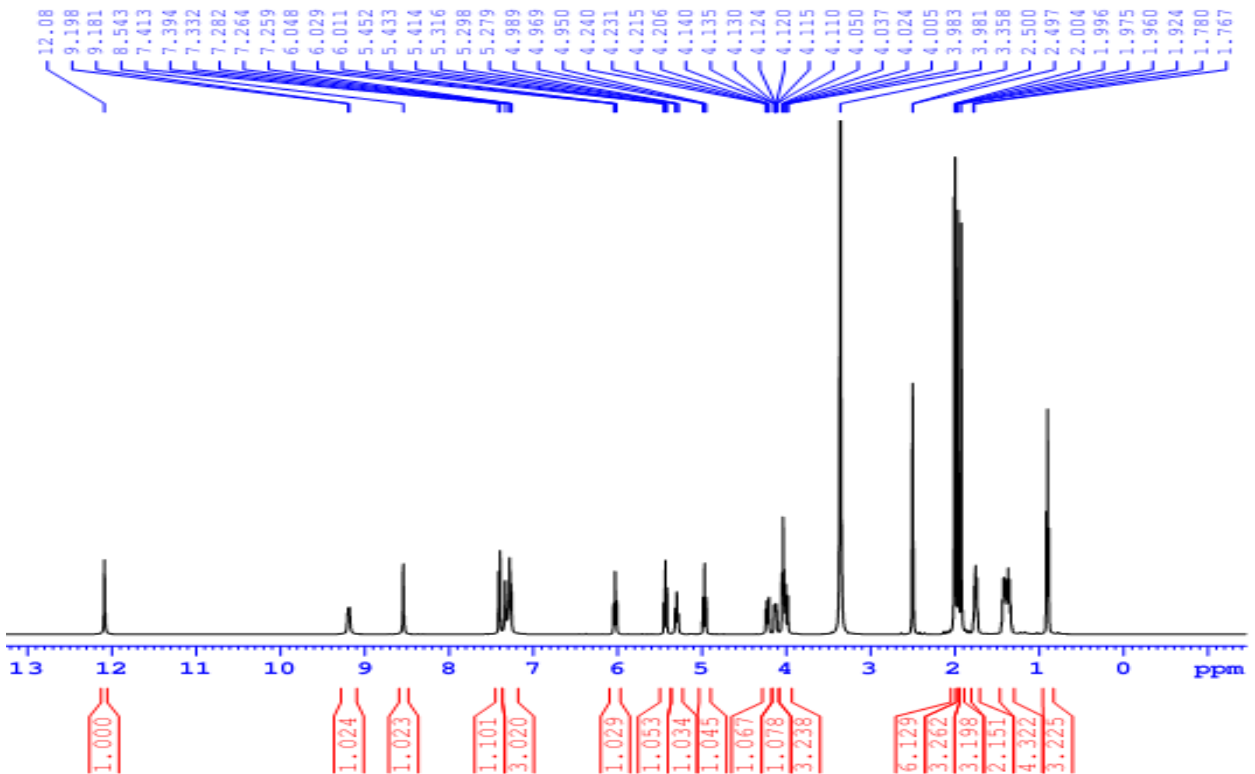

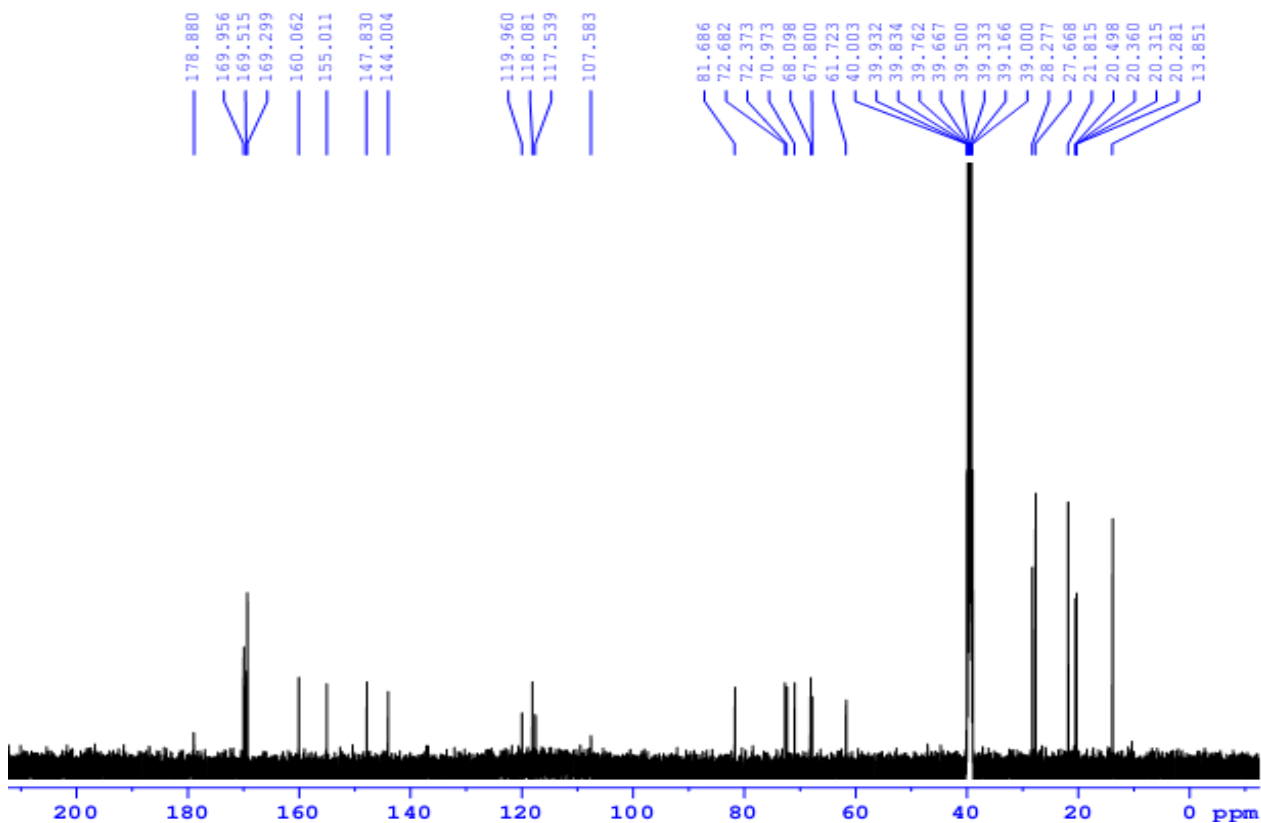

Tel: 844.38.253.053; Fax: 844.38.241.140 Mail: [Chem.vnu@edu.vn](mailto:Chem.vnu@edu.vn) Sample name : 6OPen4MeCouGlc  
 Mode: ESI, M+H

C:\LTQ Orbitrap\...5b\_200506135522 9/9/2020 2:10:35 PM

\_200506135522 #416 RT: 4.82 AV: 1 NL: 1.34E5 T:  
 ITMS + c ESI Full ms [50.00-2000.00]

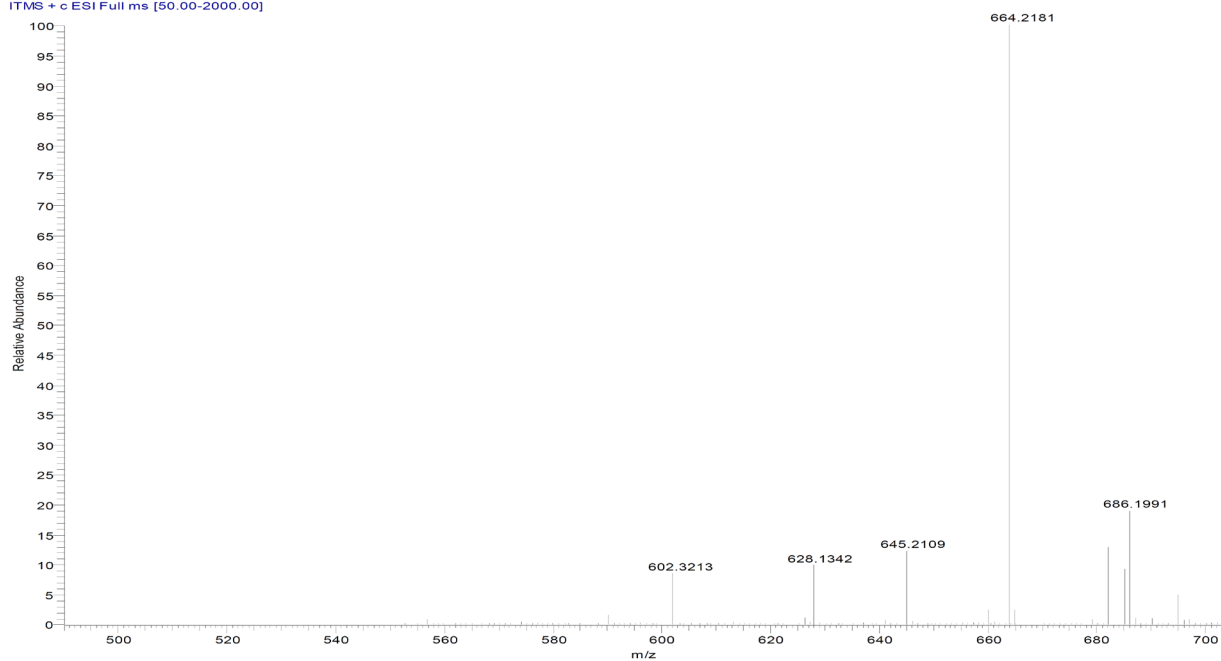

7-Isobutoxy-4-formylcoumarin 4-(2',3',4',6'-tetra-O-acetyl- $\beta$ -D-glucopyranosyl)thiosemicarbazone (3e)

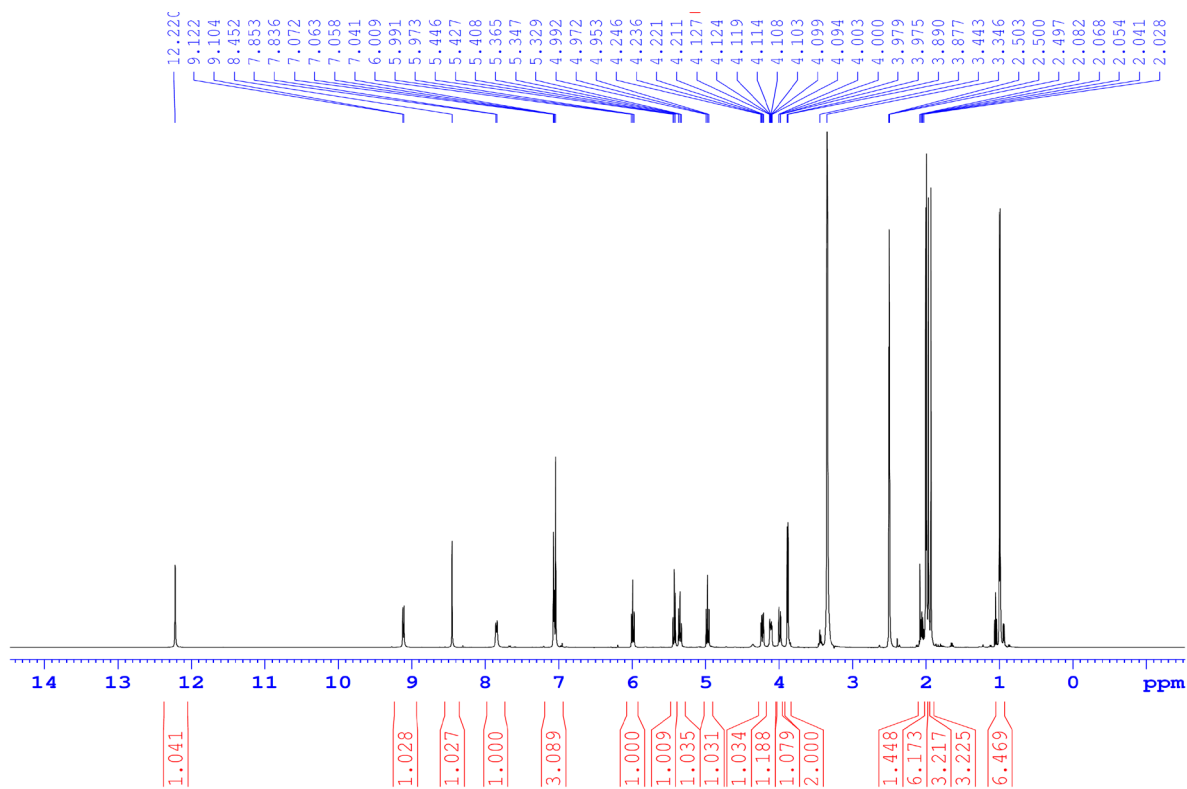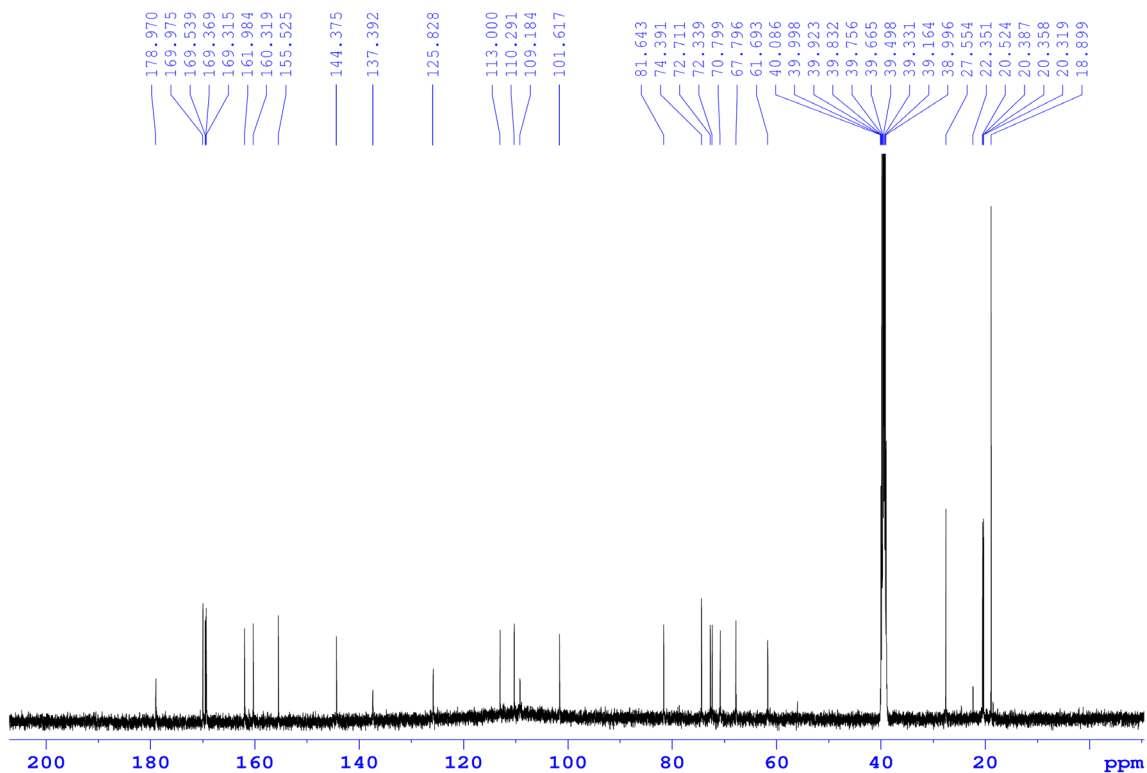

6D\_200506135522 #127 RT: 1.27 AV: 1 NL: 1.73E5  
T: ITMS + c ESI Full ms [50.00-2000.00]

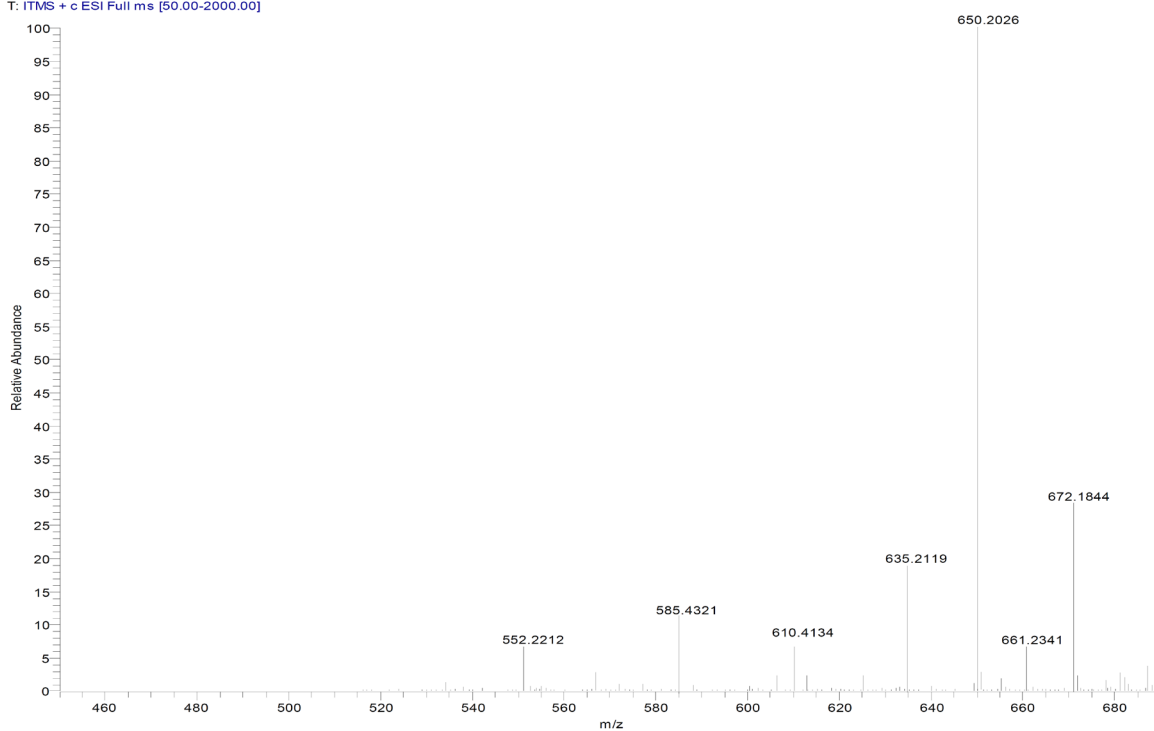

*7-Isopentoxy-4-formylcoumarin N-(2',3',4',6'-tetra-O-acetyl-β-D-glucopyranosyl)thiosemicarbazone*  
(3f)

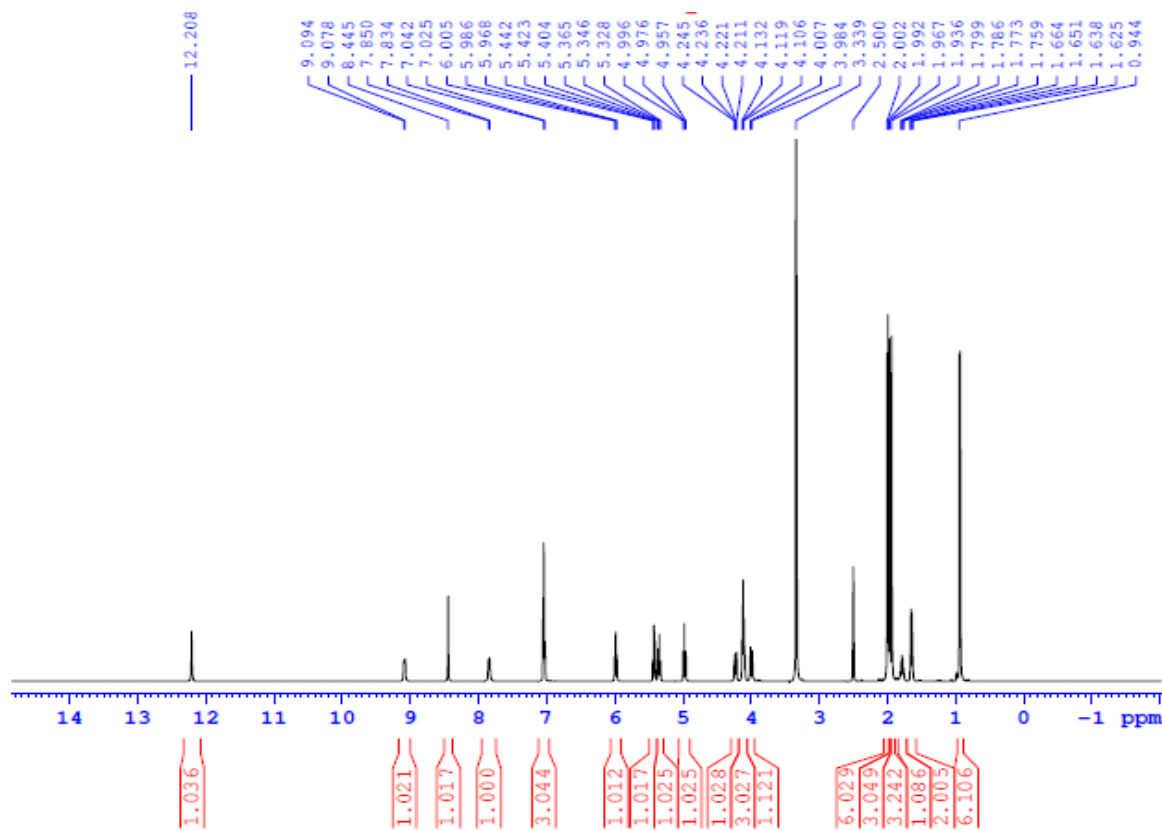

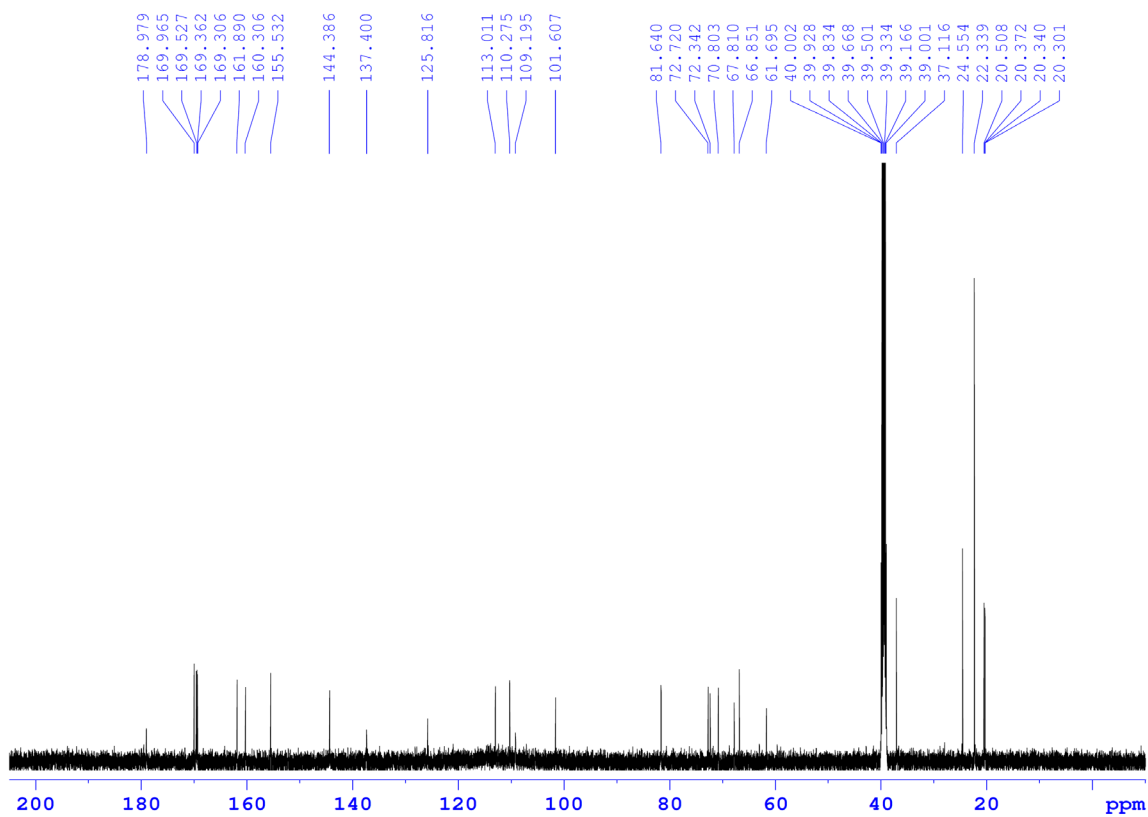

Tel: 844.58.255.055; Fax: 844.58.241.140 Mail: [Chem.vnu@edu.vn](mailto:Chem.vnu@edu.vn) Mode: ESI, M+H  
 C:\LTQ Orbitrap\...5b\_200506135522 5/6/2020 2:10:35 PM

\_200506135522 #416 RT: 4.82 AV: 1 NL: 1.34E5 T:  
 ITMS + c ESI Full ms [50.00-2000.00]

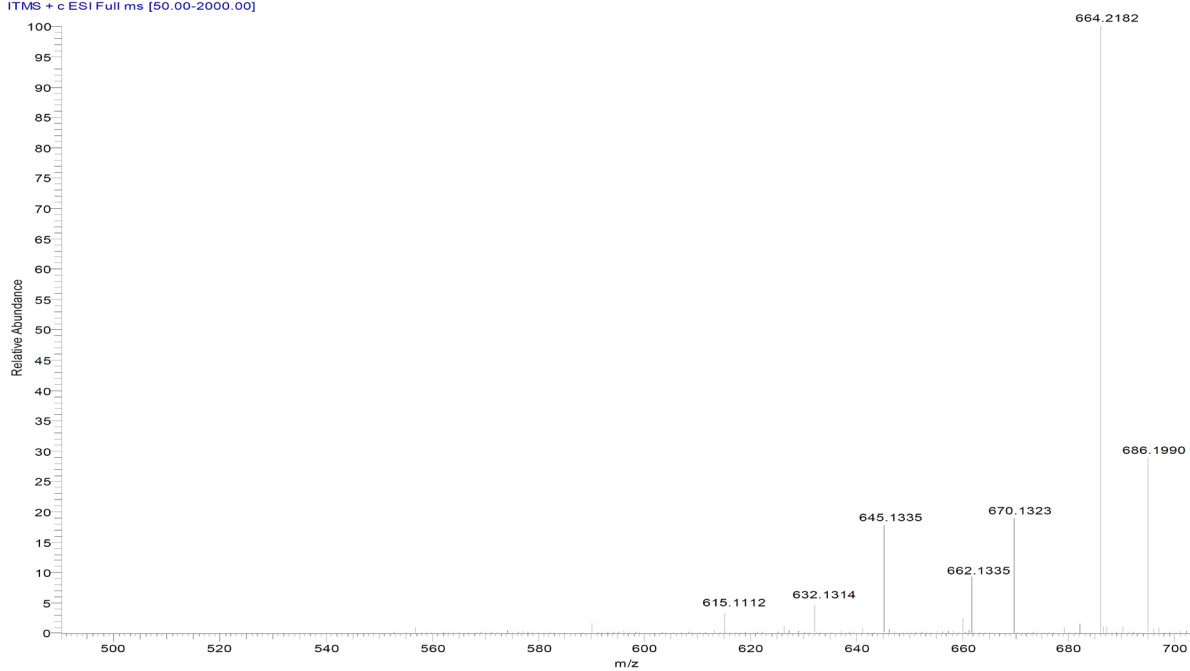

7-Methyl-4-formylcoumarin N-(2',3',4',6'-tetra-O-acetyl- $\beta$ -D-glucopyranosyl)thiosemicarbazone (3g)

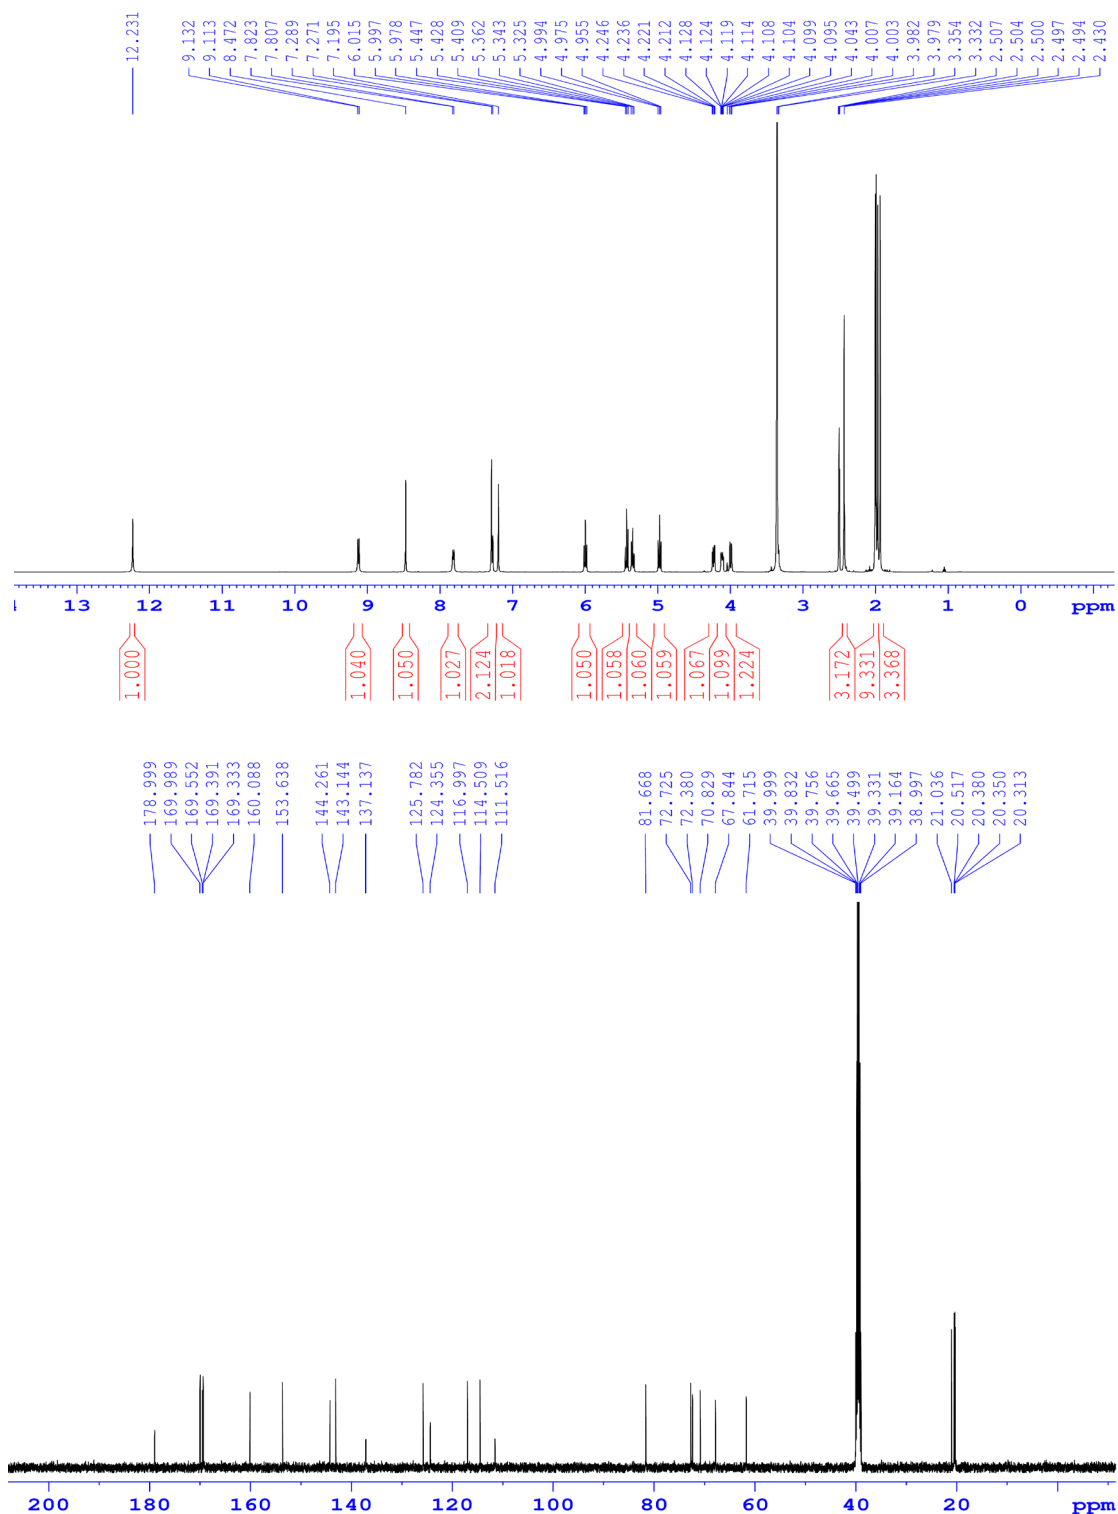



aToan\_7\_120516124\_136 #1288 RT: 3.98 AV: 1 NL: 2.99-E5  
T: ITMS -c ESI Full m s [50.00-1200.00]

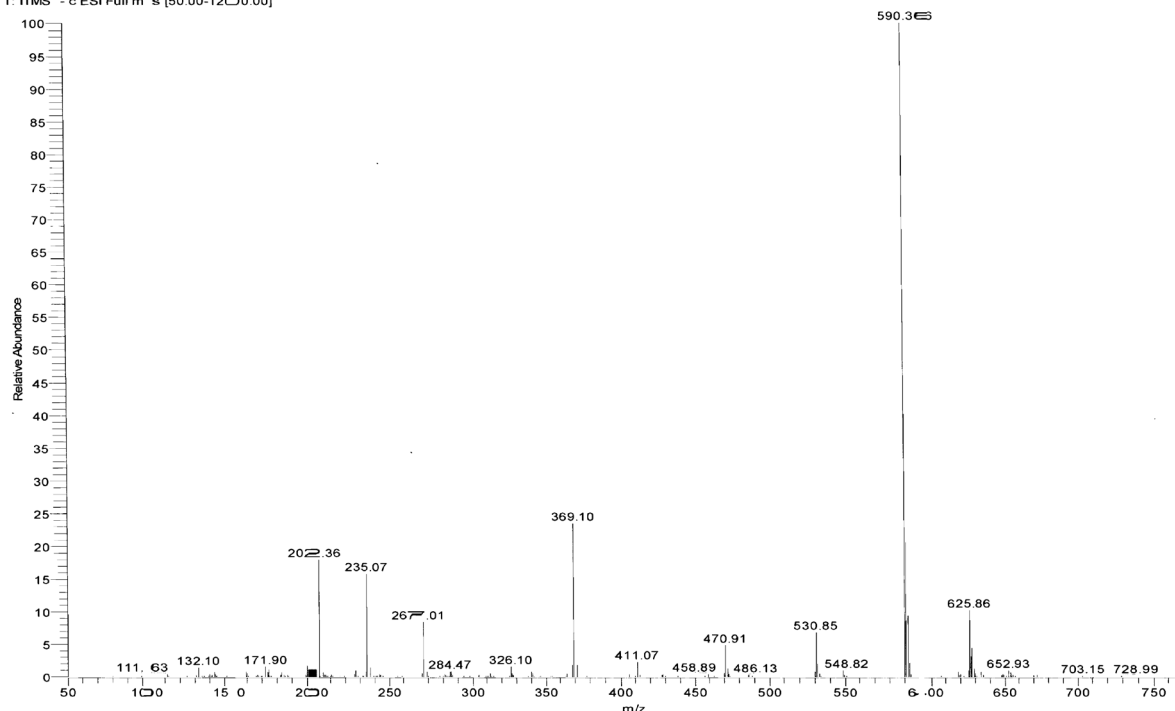

### 3. Spectra of substituted 2,3-dihydro-2(3H)-thiazoles (4a-g)

3-(4'-Phenyl-3'-(2'',3'',4'',6''-tetra-O-acetyl- $\beta$ -D-glucopyranosyl)thiazol-2'(3'H)-ylidene)hydrazono)ethyl)coumarin (4a)

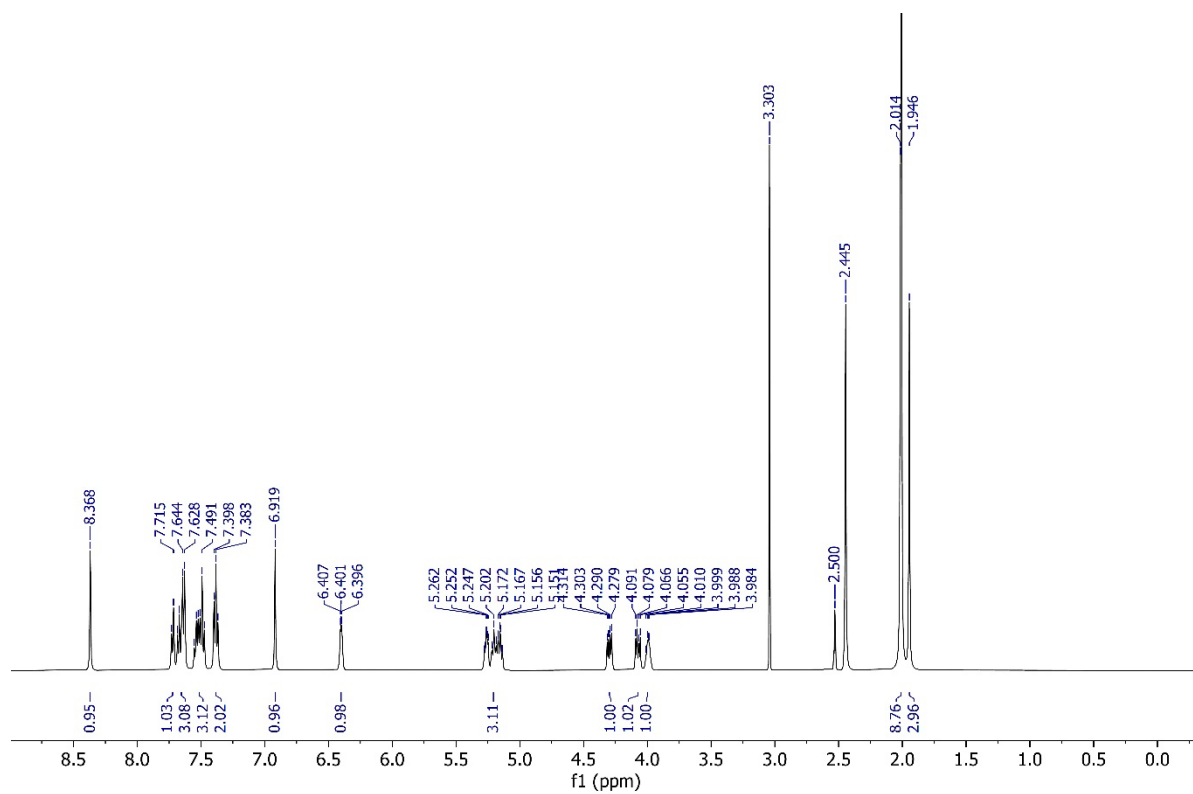

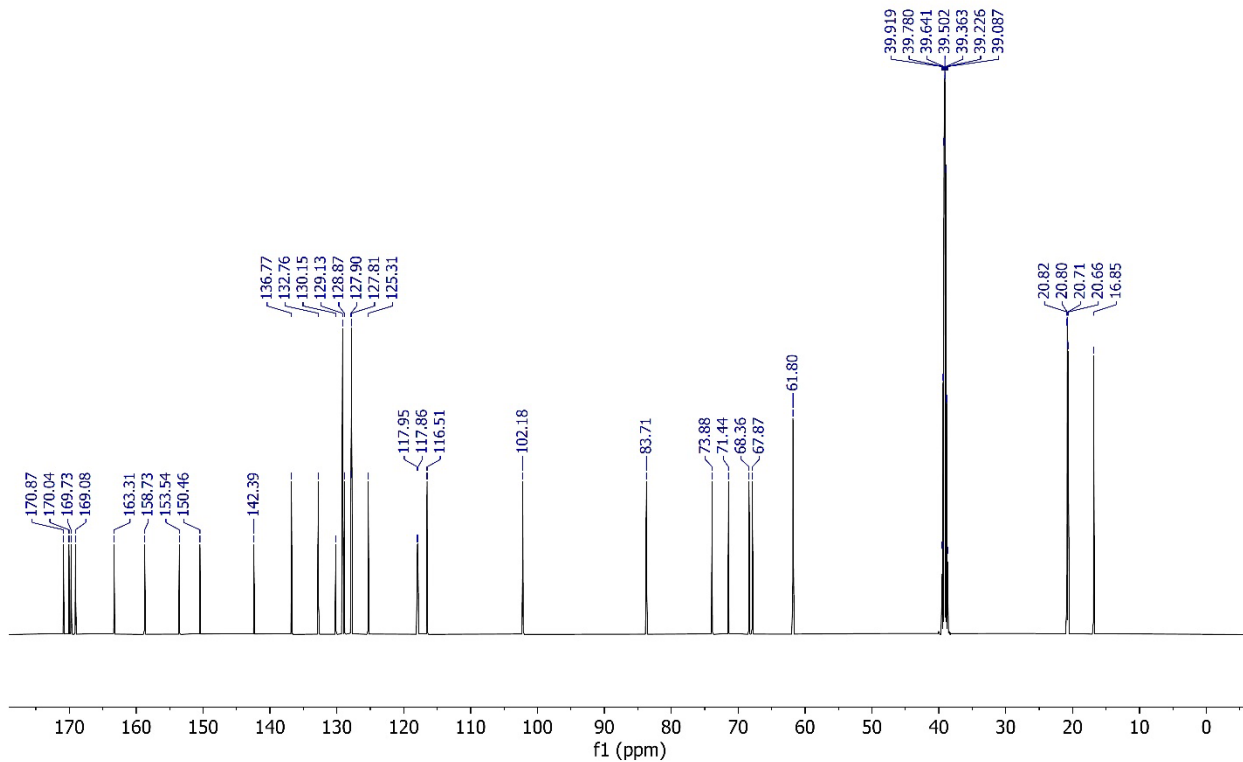

C:\LTQ Orbitrap\...5b\_200506135522

9/9/2020 2:10:35 PM Mode: ESI, M+H

200506135522 #416 RT: 4.82 AV: 1 NL: 1.34E5 T:  
ITMS + c ESI Full ms [50.00-2000.00]

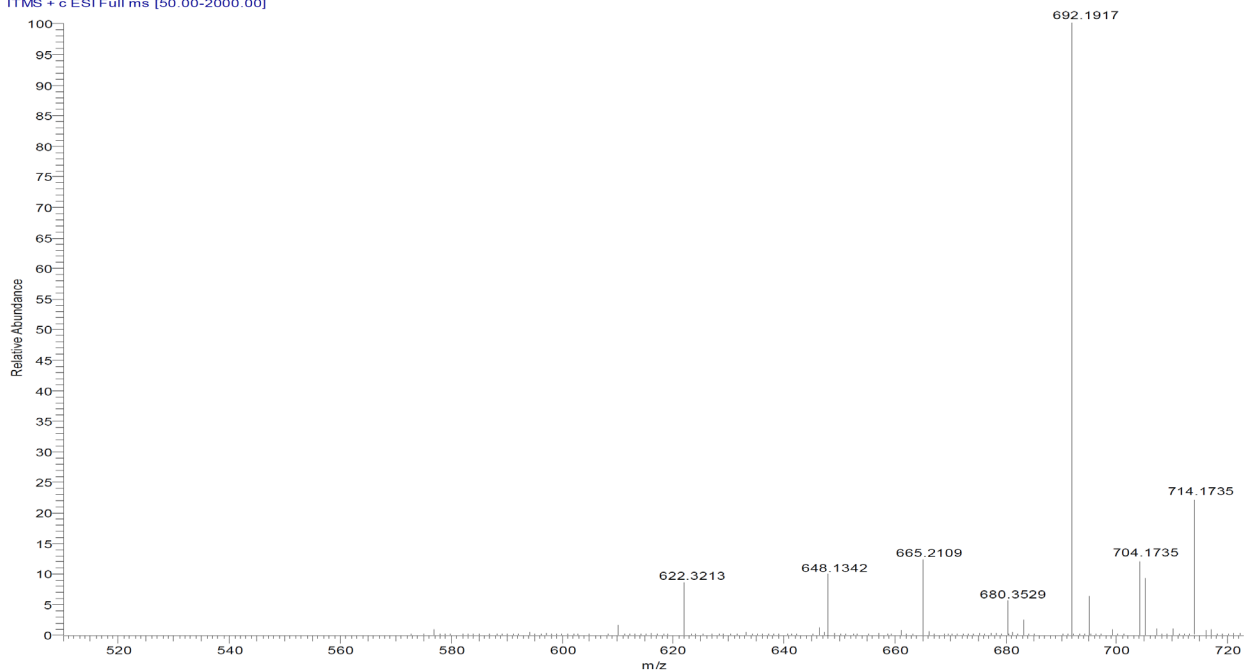

3-(4'-Phenyl-3'-(2'',3'',4'',6''-tetra-O-acetyl- $\beta$ -D-galactopyranosyl)thiazol-2'(3'H)-ylidene)hydrazono)ethyl)-6-chlorocoumarin (**4b**)

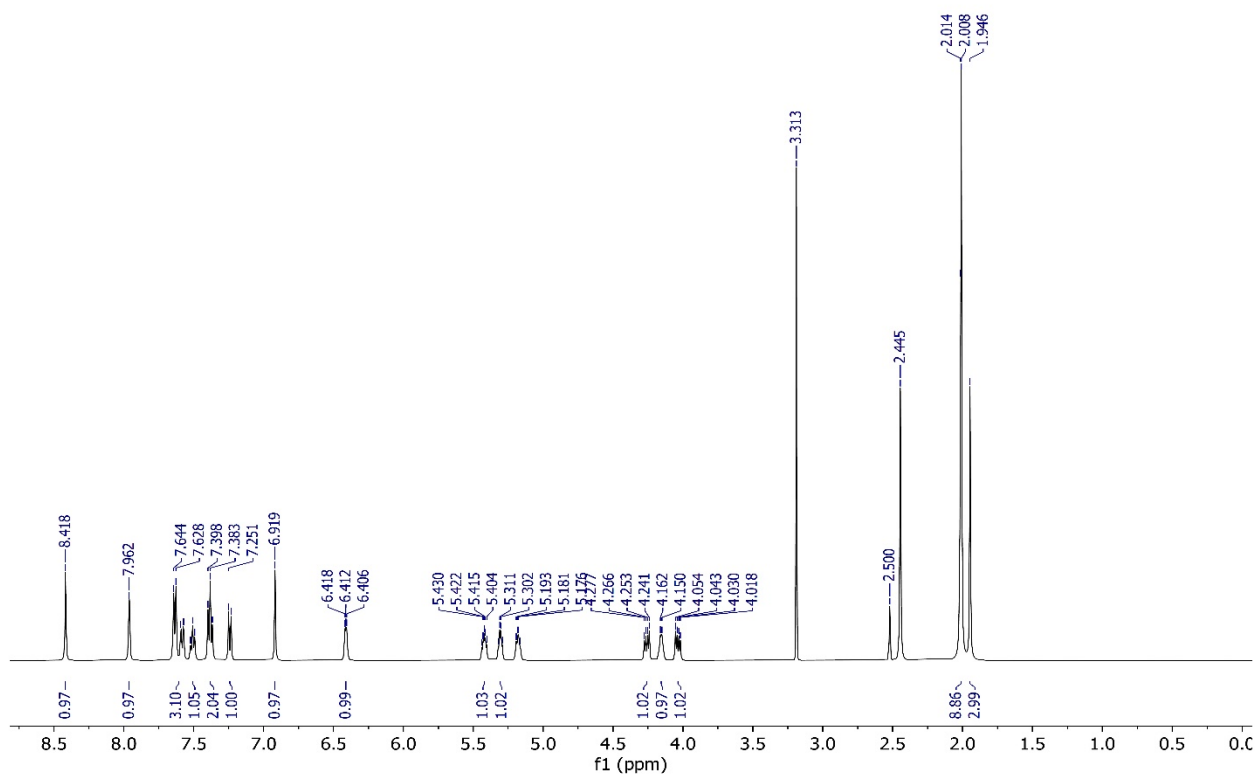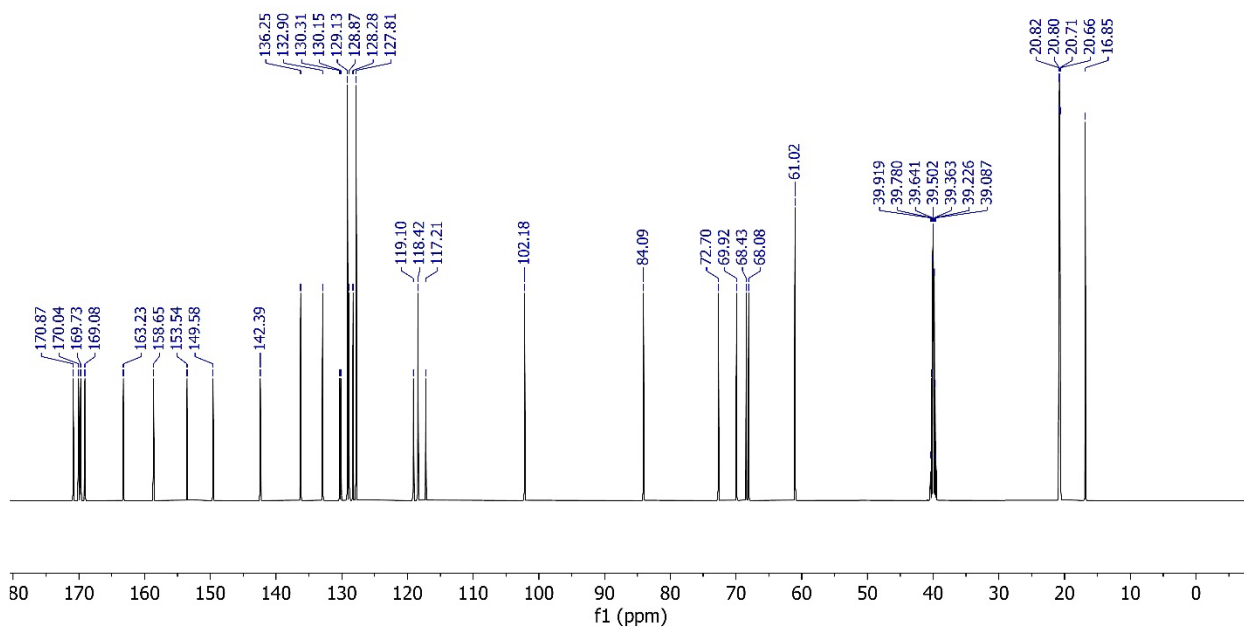

\_200506135522 #416 RT: 4.82 AV: 1 NL: 1.34E5 T:  
ITMS + c ESI Full ms [50.00-2000.00]

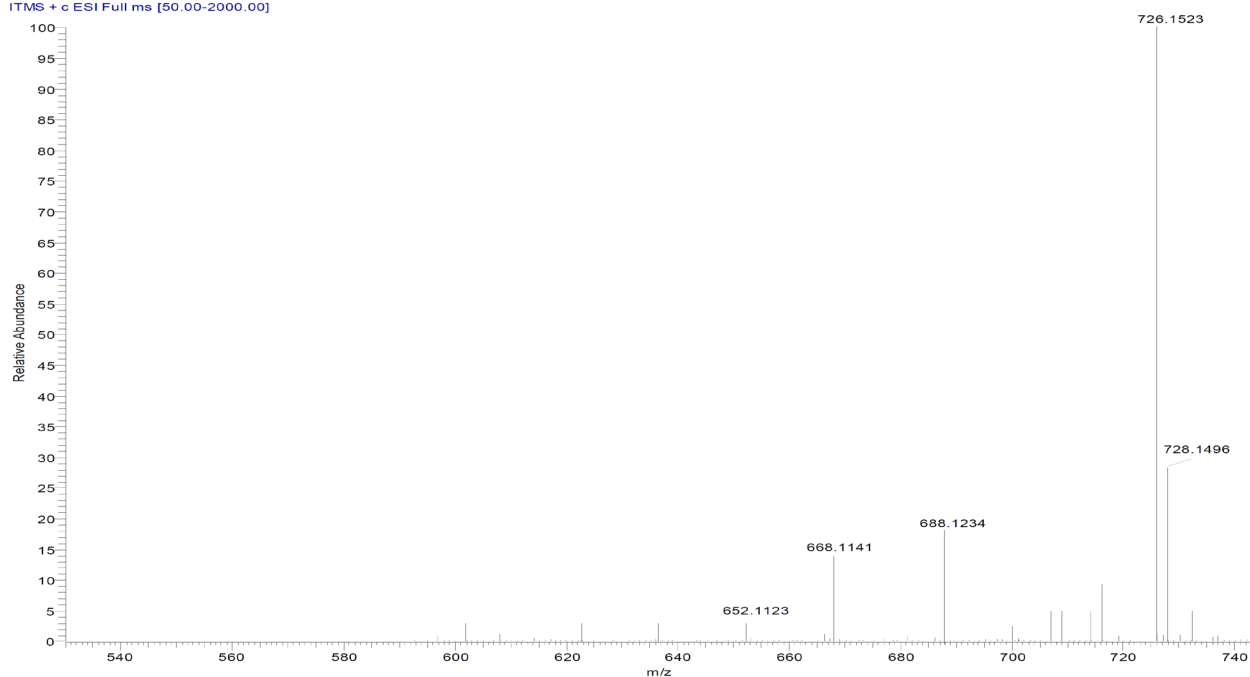

*3-(4'-Phenyl-3'-(2'',3'',4'',6''-tetra-O-acetyl-β-D-galactopyranosyl)thiazol-2'(3'H)-ylidene)hydrazono)ethyl)-6-bromocoumarin (4c)*

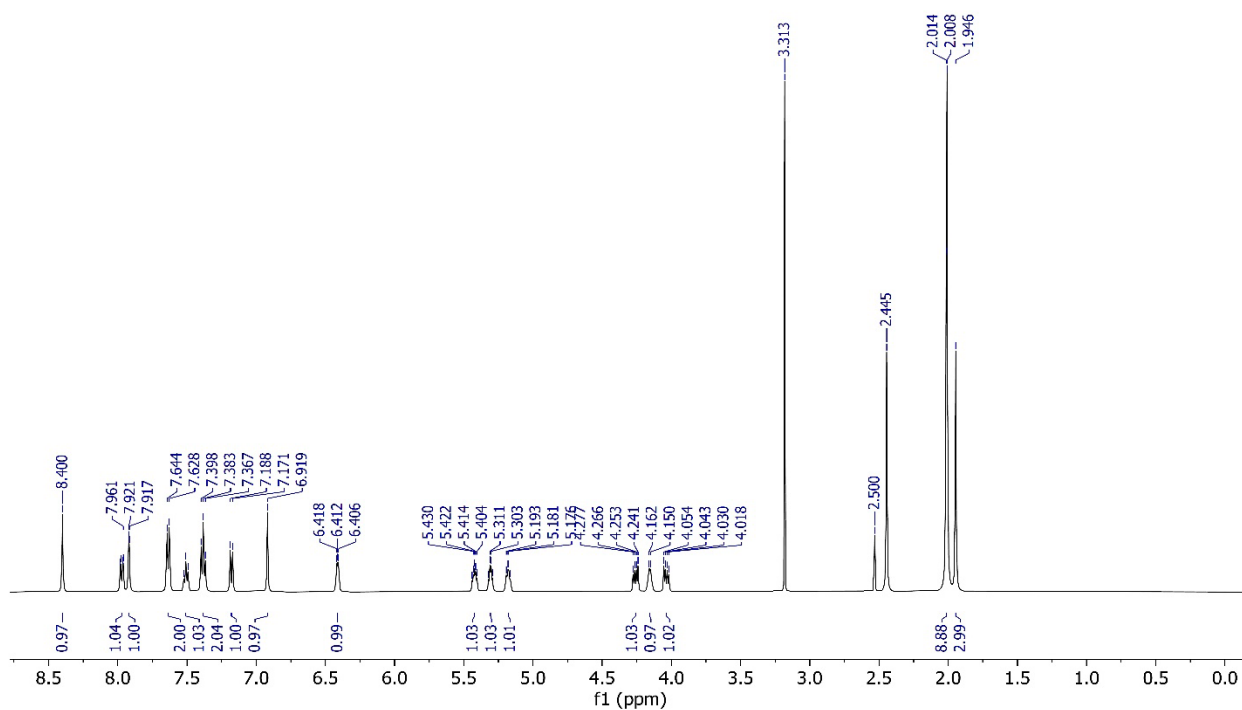

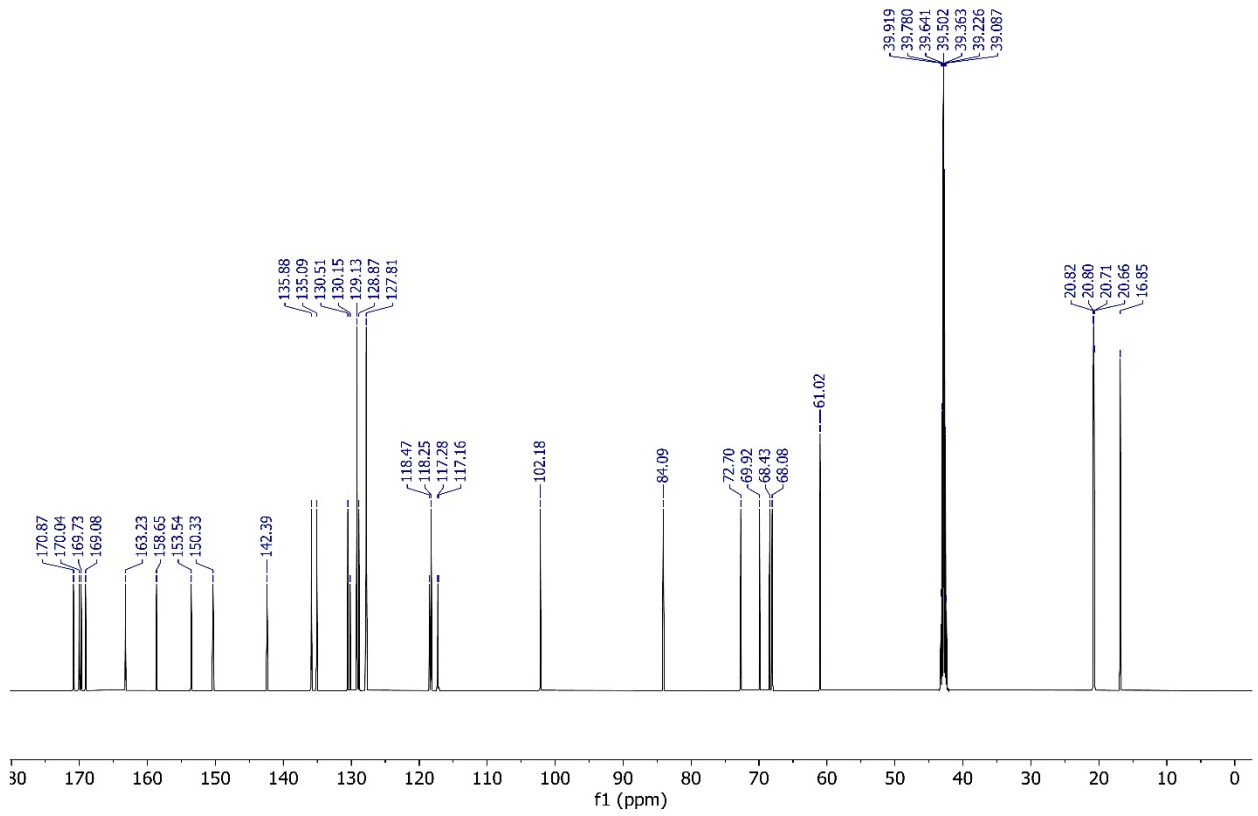

Mode: ESI, M+H  
 CALTQ Orbitrap...6G\_200506135534 8/9/2020 5:16:43 PM

6D\_200506135522 #127 RT: 1.27 AV: 1 NL: 1.73E5  
 T: ITMS + c ESI Full ms [50.00-2000.00]

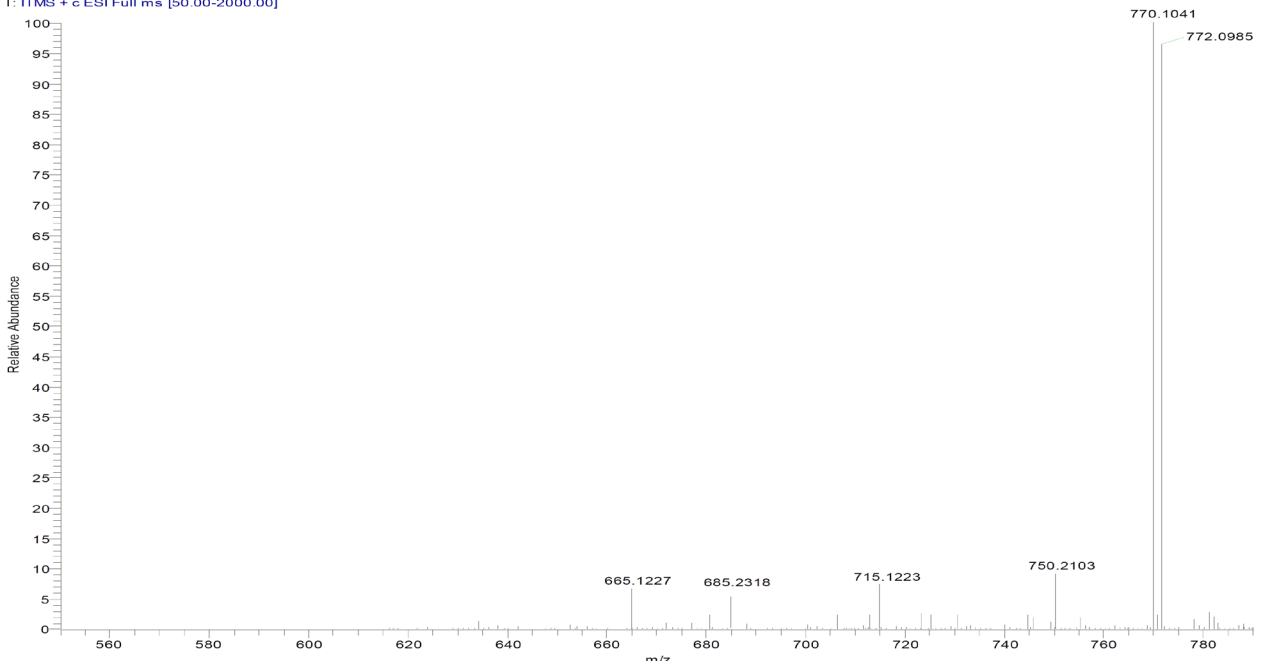

4-(4'-Phenyl-3'-(2'',3'',4'',6''-tetra-O-acetyl- $\beta$ -D-glucopyranosyl)thiazol-2'(3'H)-ylidene)hydrazono)methyl)-6-pentoxycoumarin (**4d**)

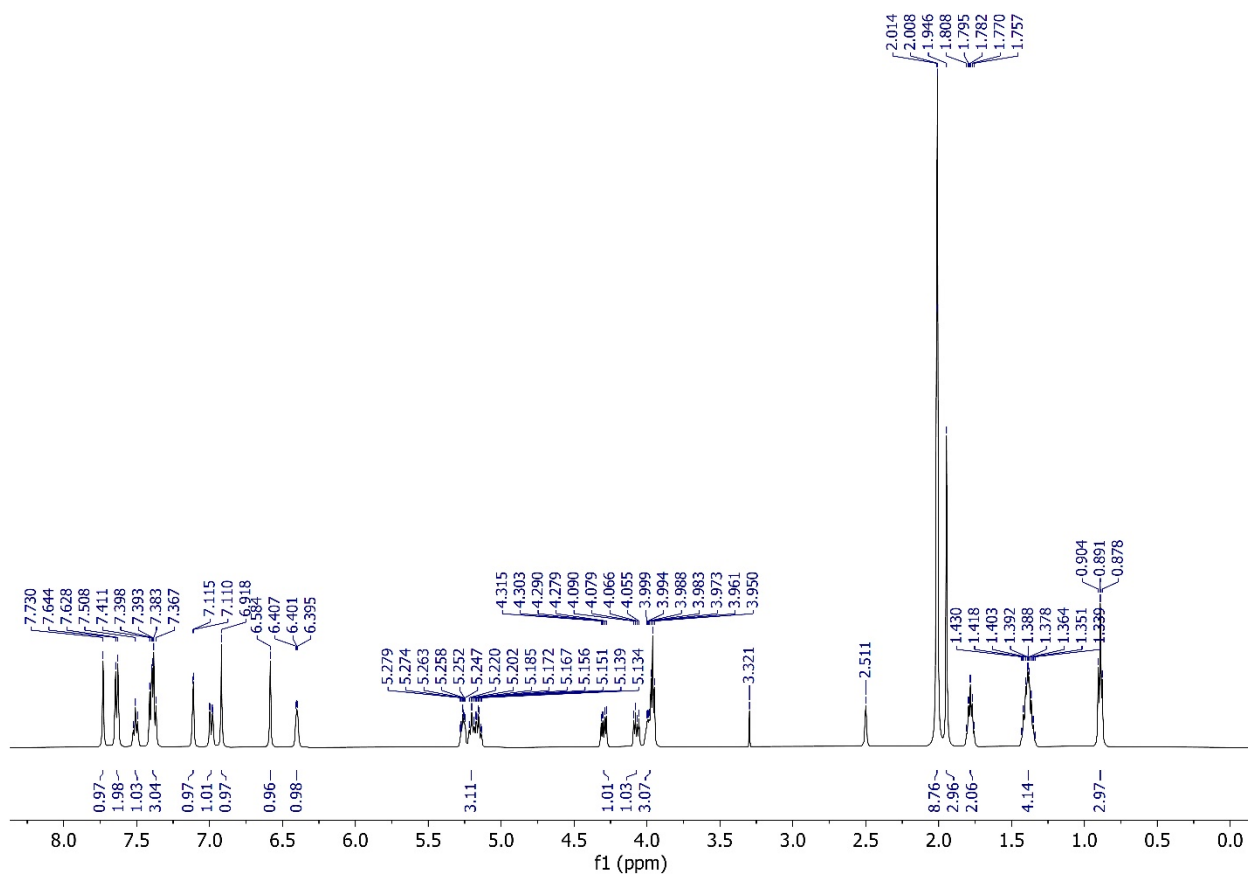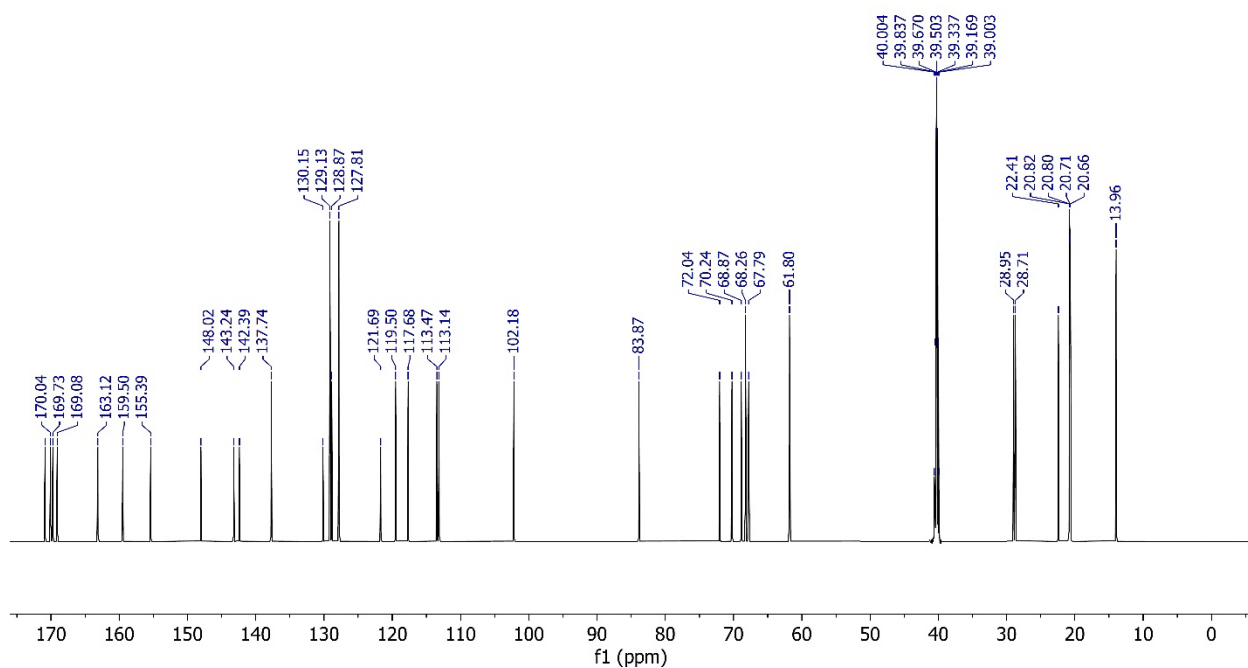

6D\_200506135522 #127 RT: 1.27 AV: 1 NL: 1.73E5  
T: ITMS + c ESI Full ms [50.00-2000.00]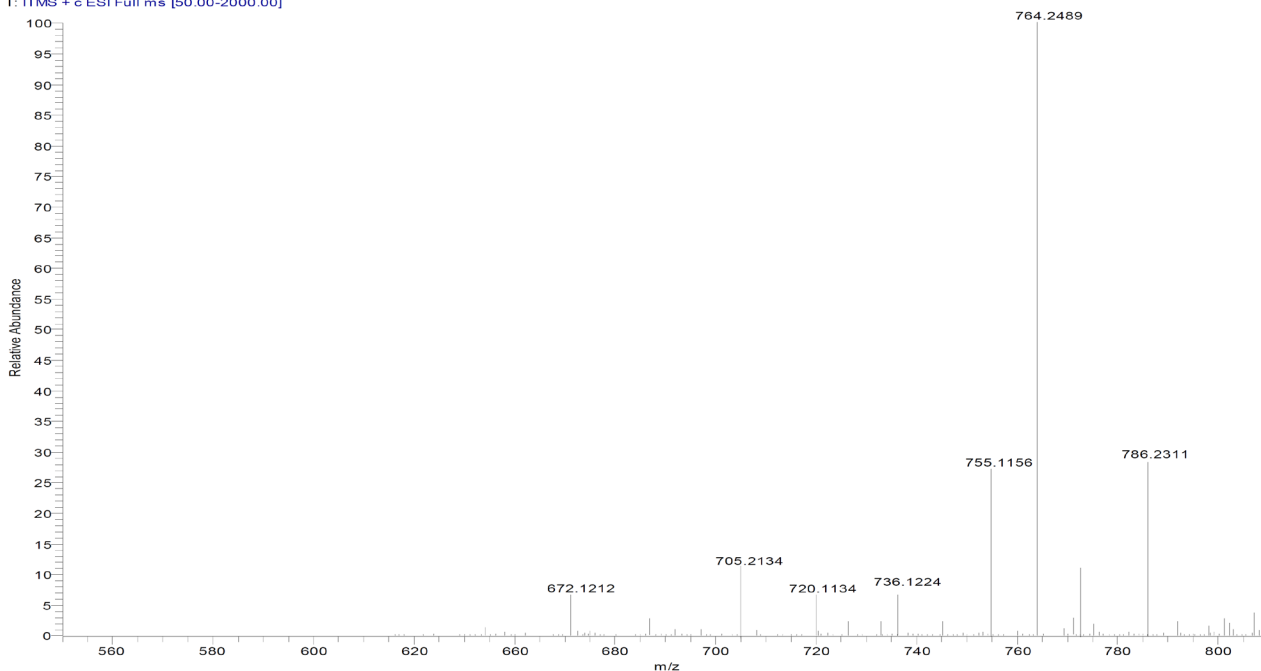

4-(4'-Phenyl-3'-(2'',3'',4'',6''-tetra-O-acetyl- $\beta$ -D-glucopyranosyl)thiazol-2'(3'H)-ylidene)hydrazono)methyl)-7-isobutoxycoumarin (**4e**)

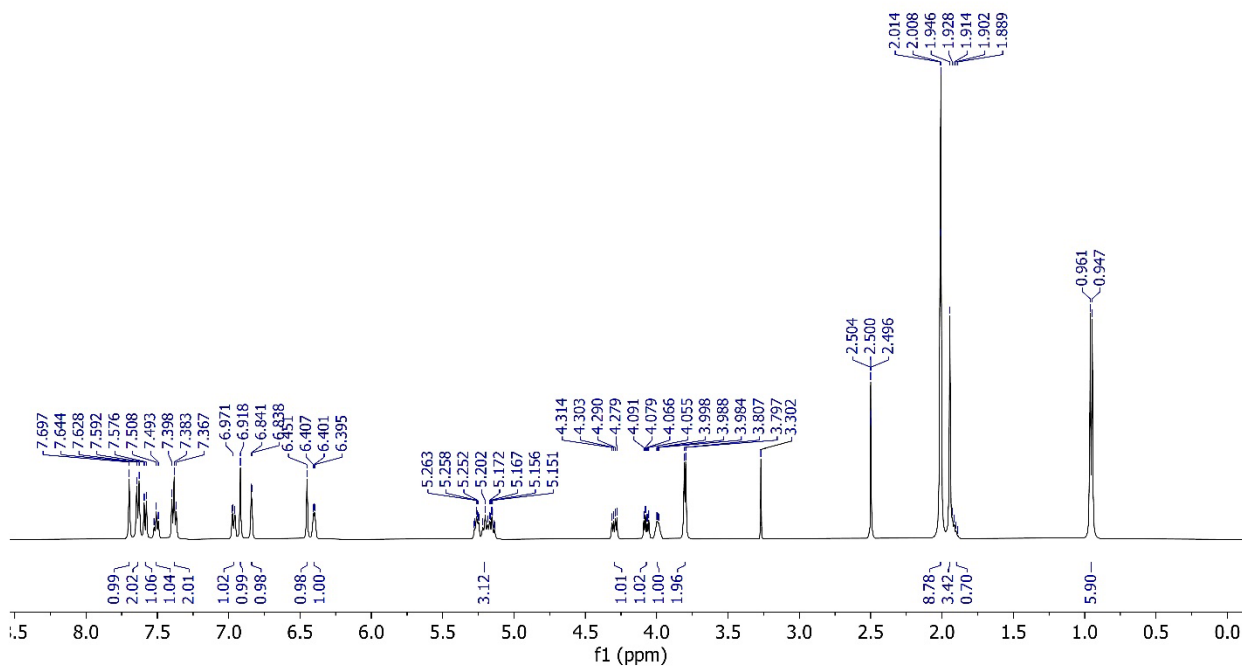

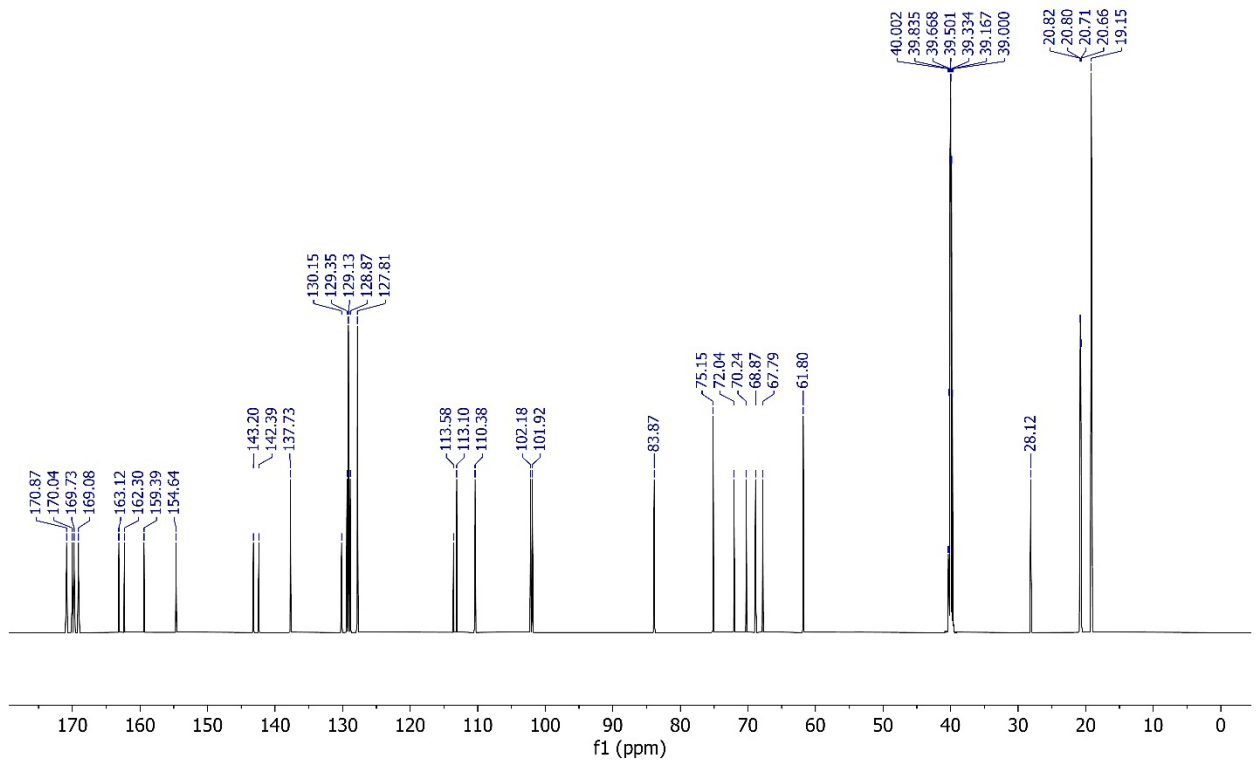

C:\LTQ Orbitrap\...5b\_200506135522

5/6/2020 5:15:35 PM Mode: ESI, M+H

\_200506135521 #416 RT: 4.82 AV: 1 NL: 1.34E5 T:  
ITMS + c ESI Full ms [50.00-2000.00]

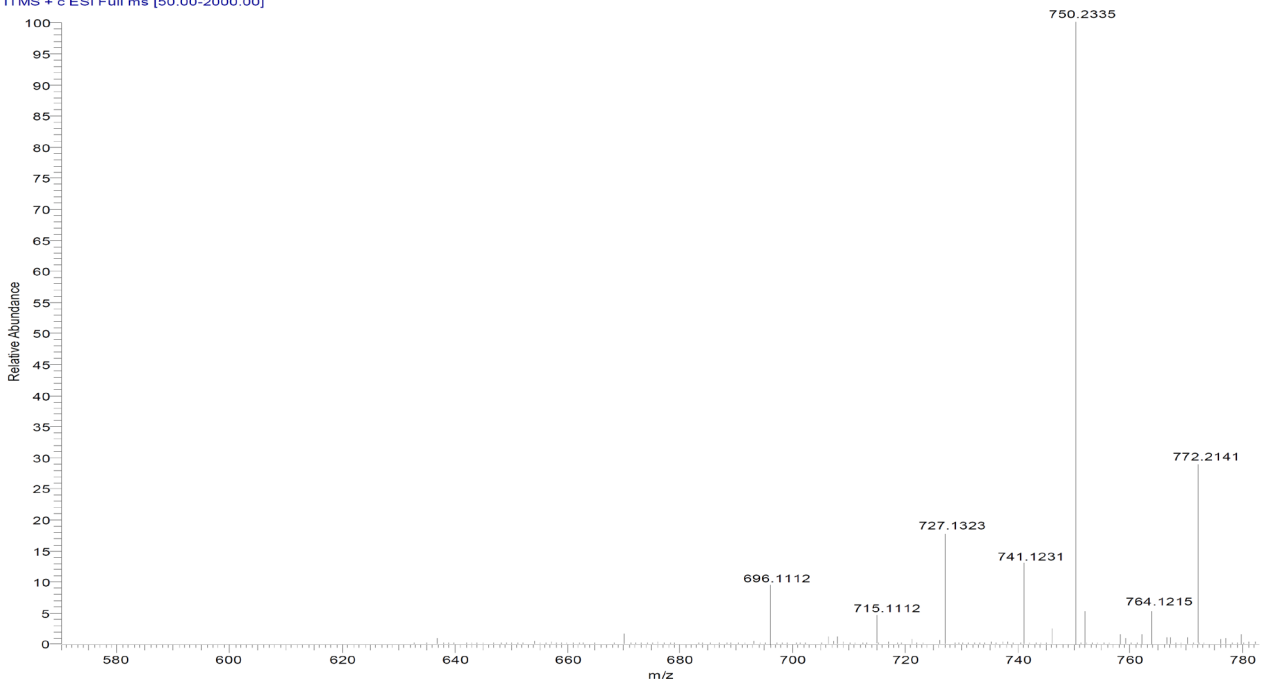



4-(4'-Phenyl-3-(2,3,4,6-tetra-O-acetyl- $\beta$ -D-glucopyranosyl)thiazol-2'(3'H)-ylidene)hydrazono)methyl)-7-isopentoxycoumarin (**4f**)

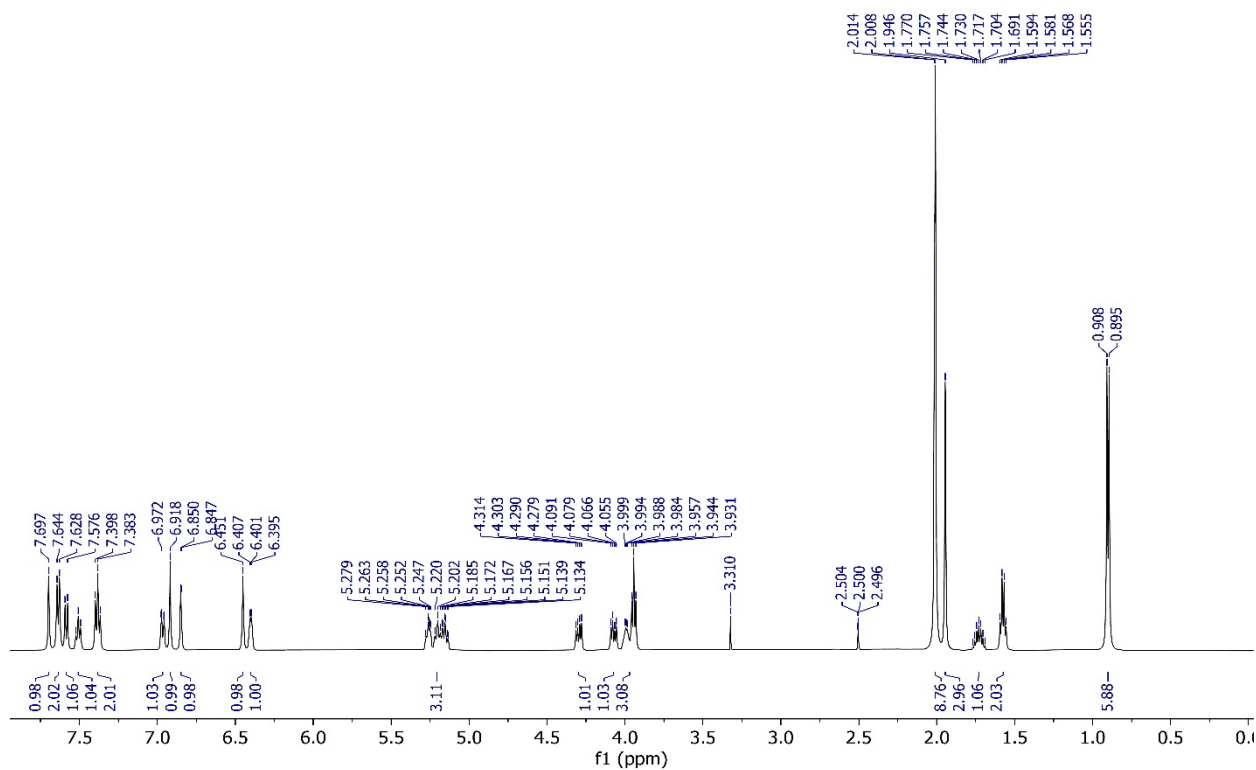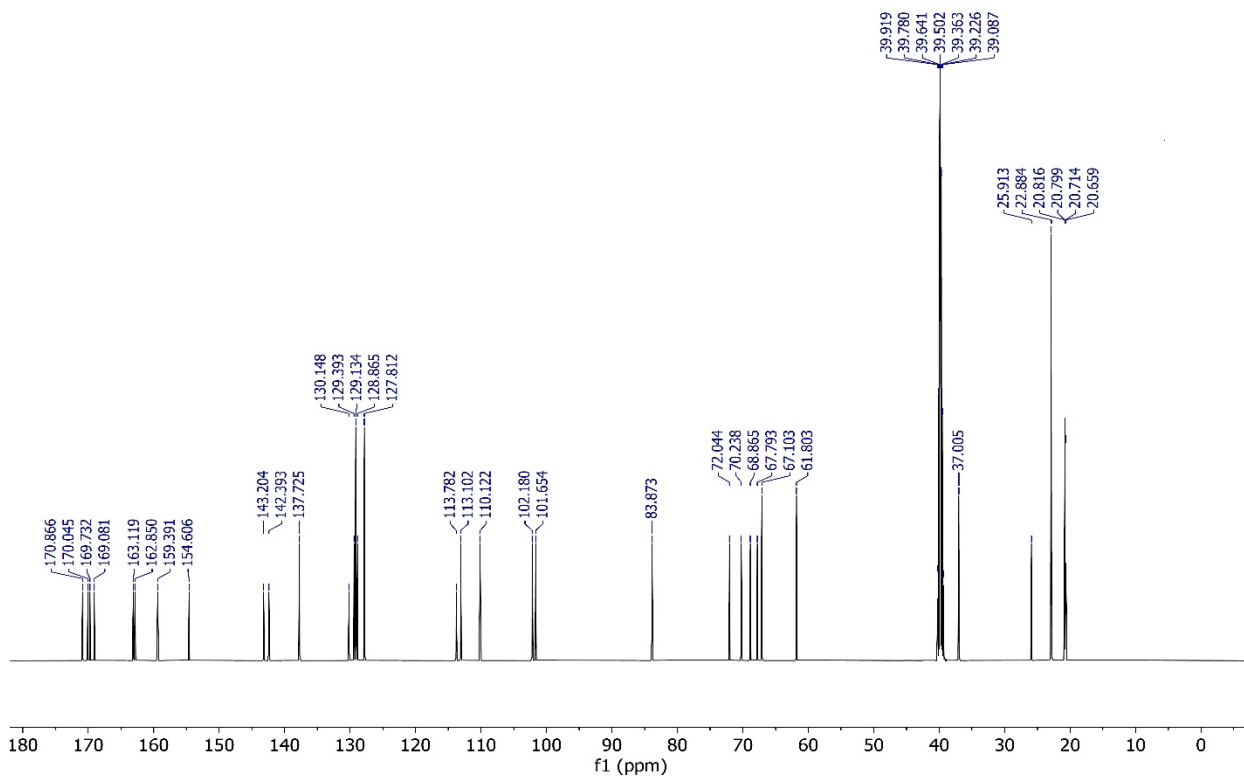

\_200506135521 #416 RT: 4.82 AV: 1 NL: 1.34E5 T:  
ITMS + c ESI Full ms [50.00-2000.00]

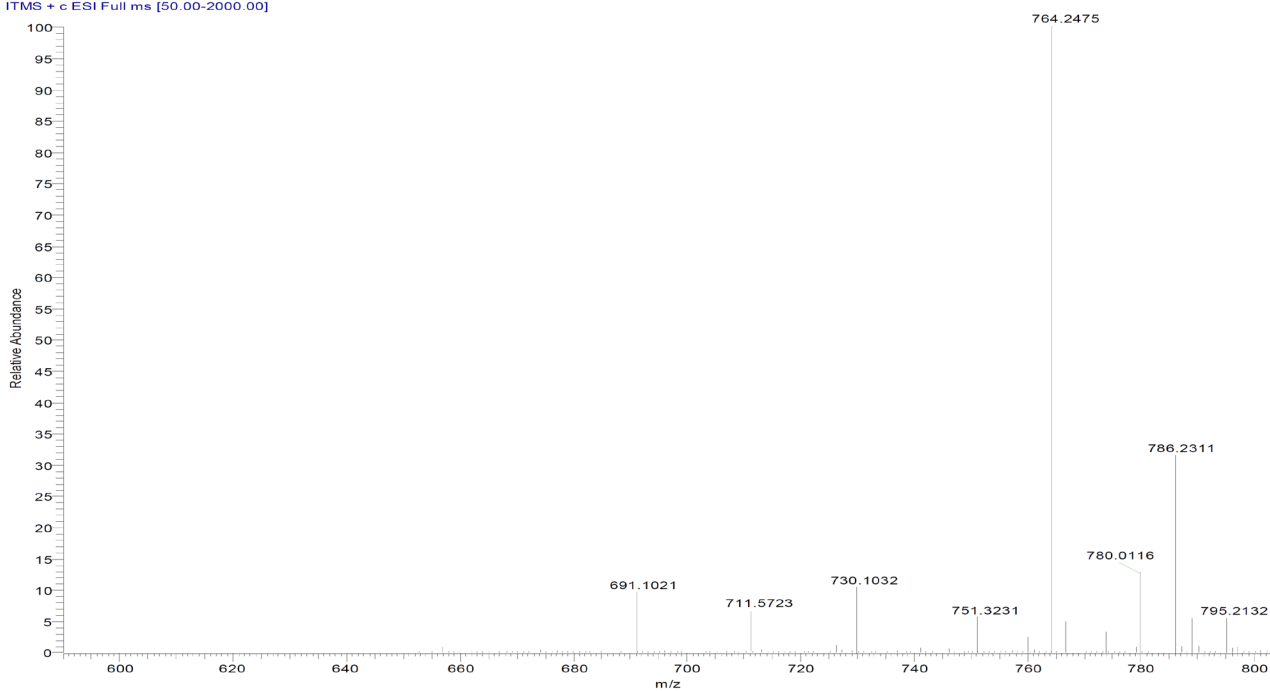

*4-(4'-Phenyl-3'-(2'',3'',4'',6''-tetra-O-acetyl- $\beta$ -D-glucopyranosyl)thiazol-2'(3'H)-ylidene)hydrazono)methyl)-7-methylcoumarin (4g)*

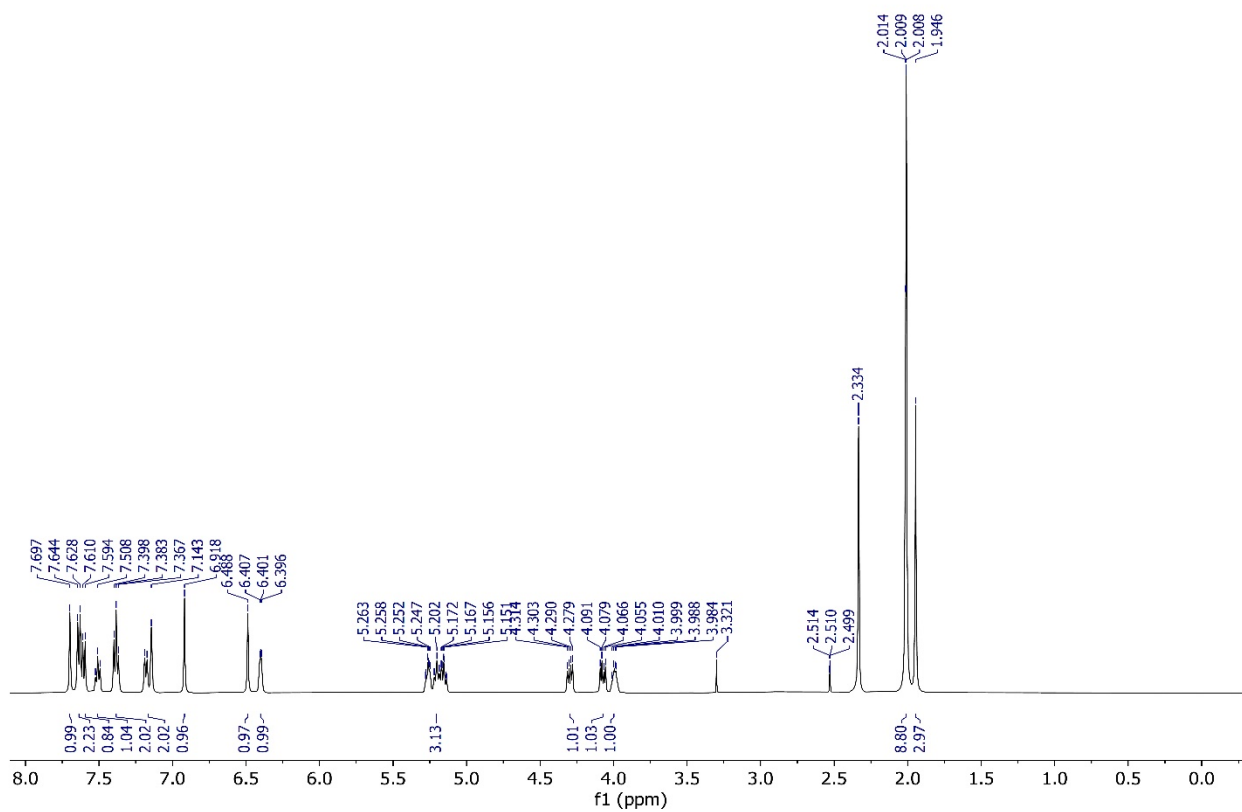

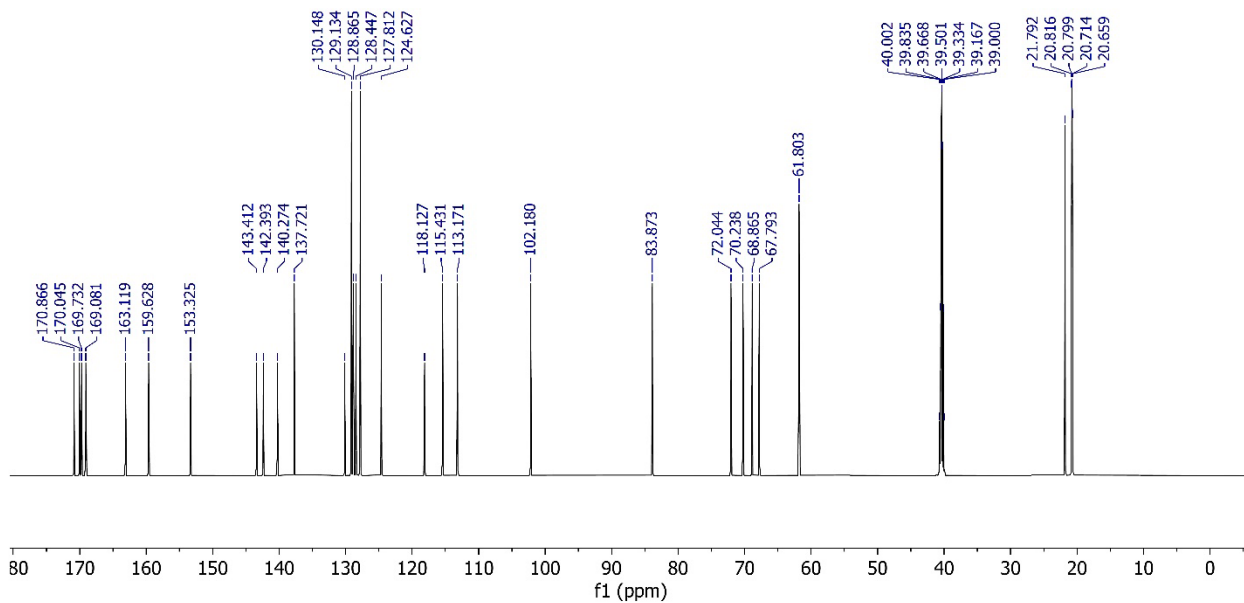

C:\LTQ Orbitrap\...6G\_200506135535

8/9/2020 9:11:11 AM Mode: ESI, M+H

6D\_200506135522 #127 RT: 1.27 AV: 1 NL: 1.73E5  
T: ITMS + c ESI Full ms [50.00-2000.00]

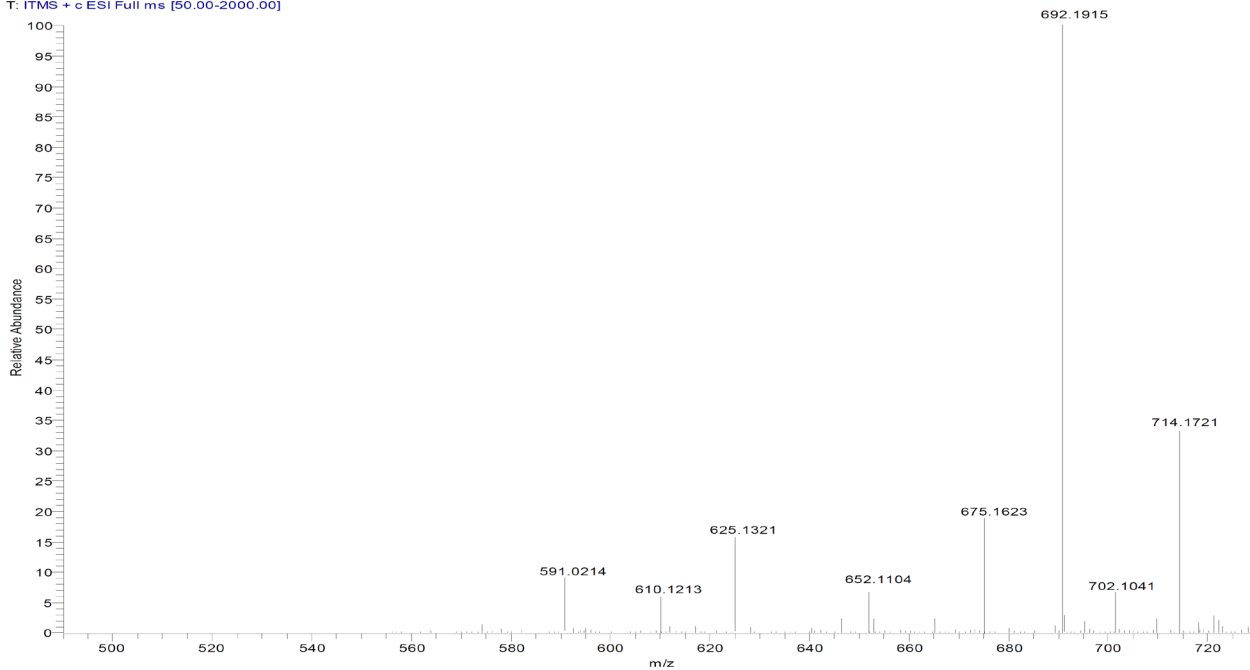

Supplement: d1nj00680k1.pdf [file d1nj00680k1.pdf]
